# Supplementary material for: New interfaces on MiD51 for Drp1 recruitment and regulation
Source: PubMed Central journal article supplement (PMC6355003; doi:10.1371/journal.pone.0211459), 2019-01-31

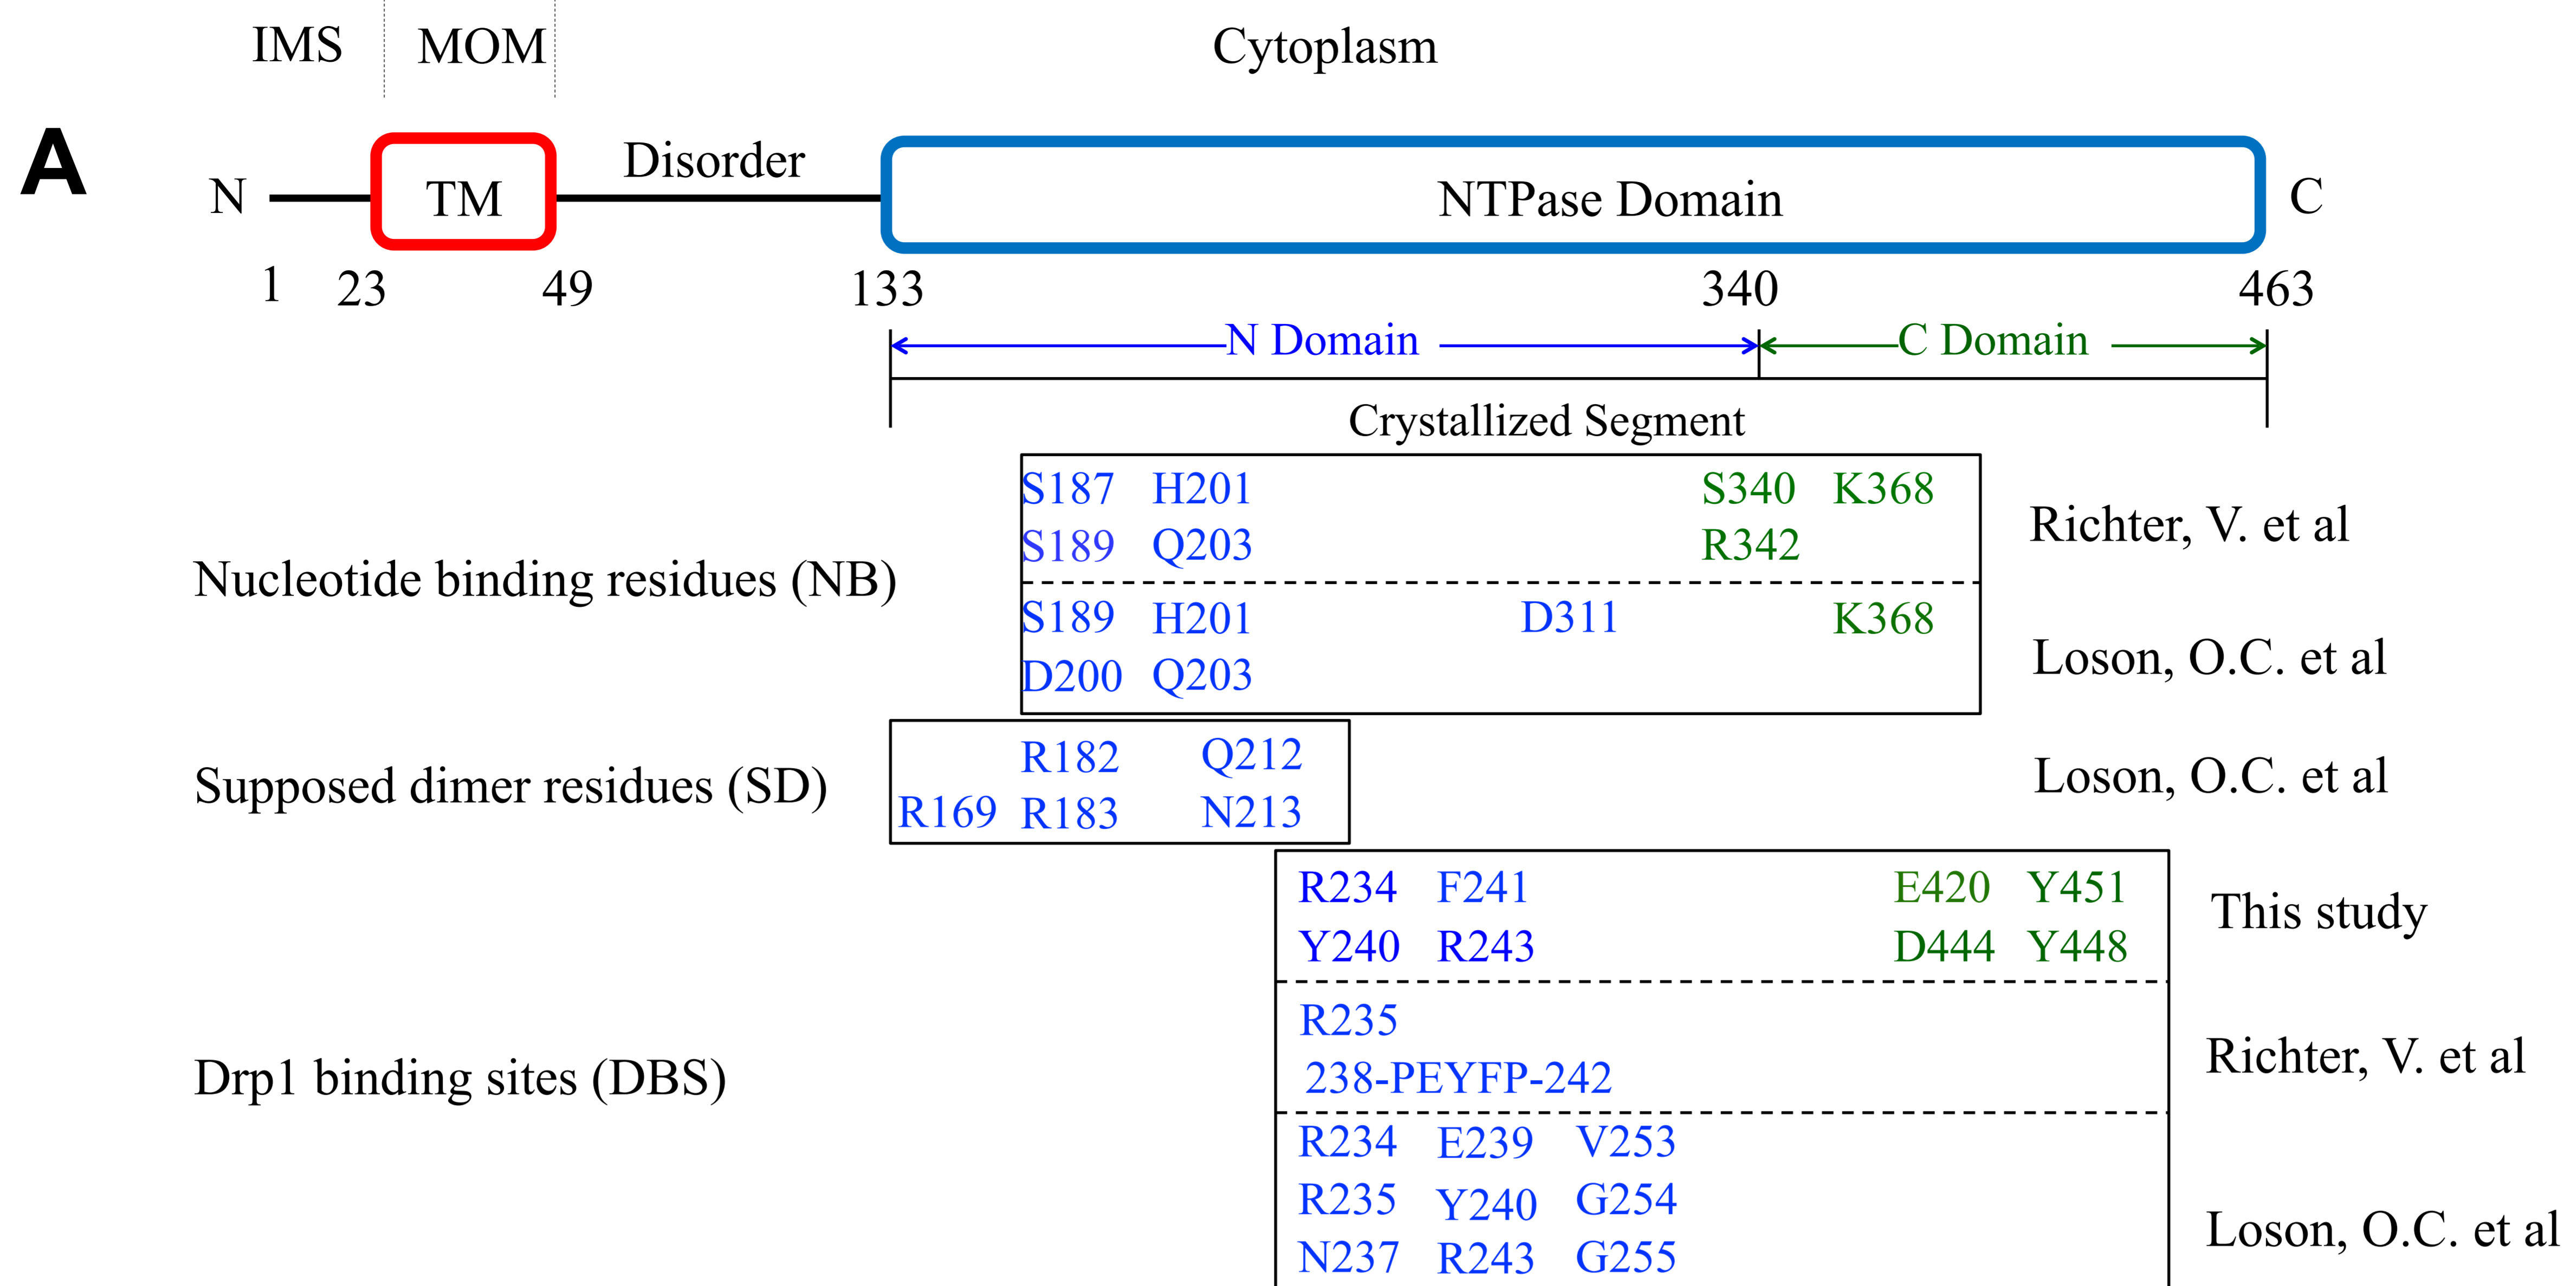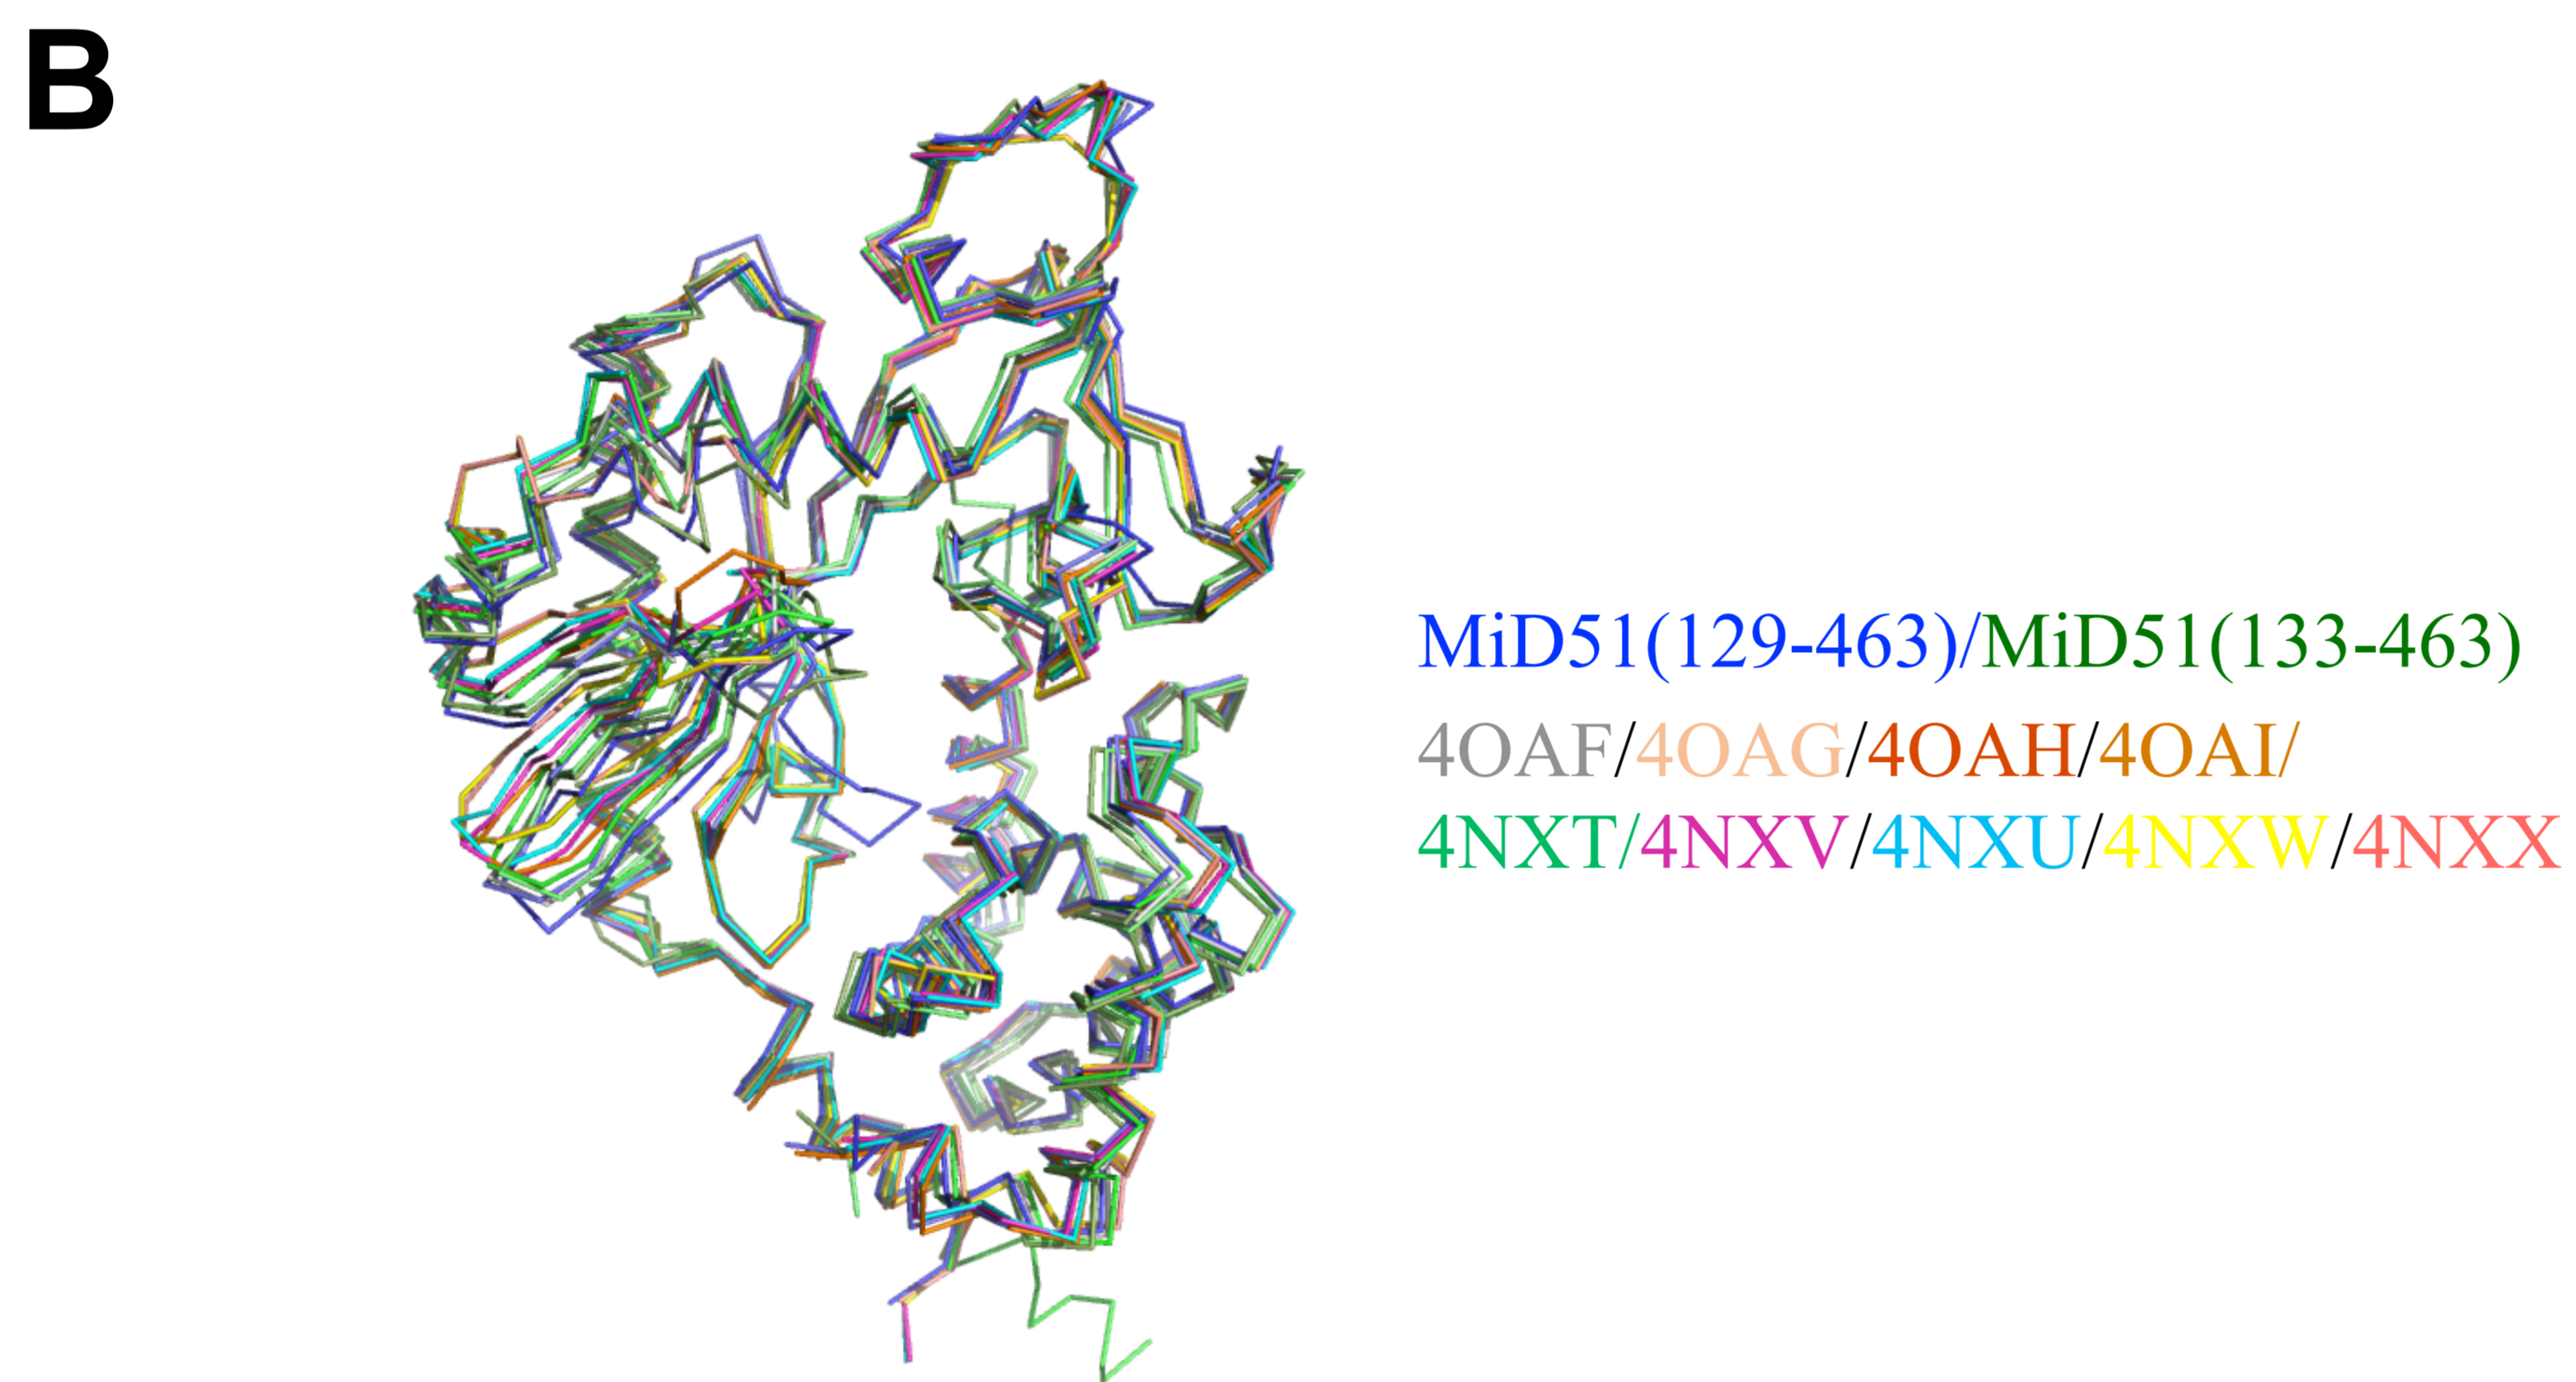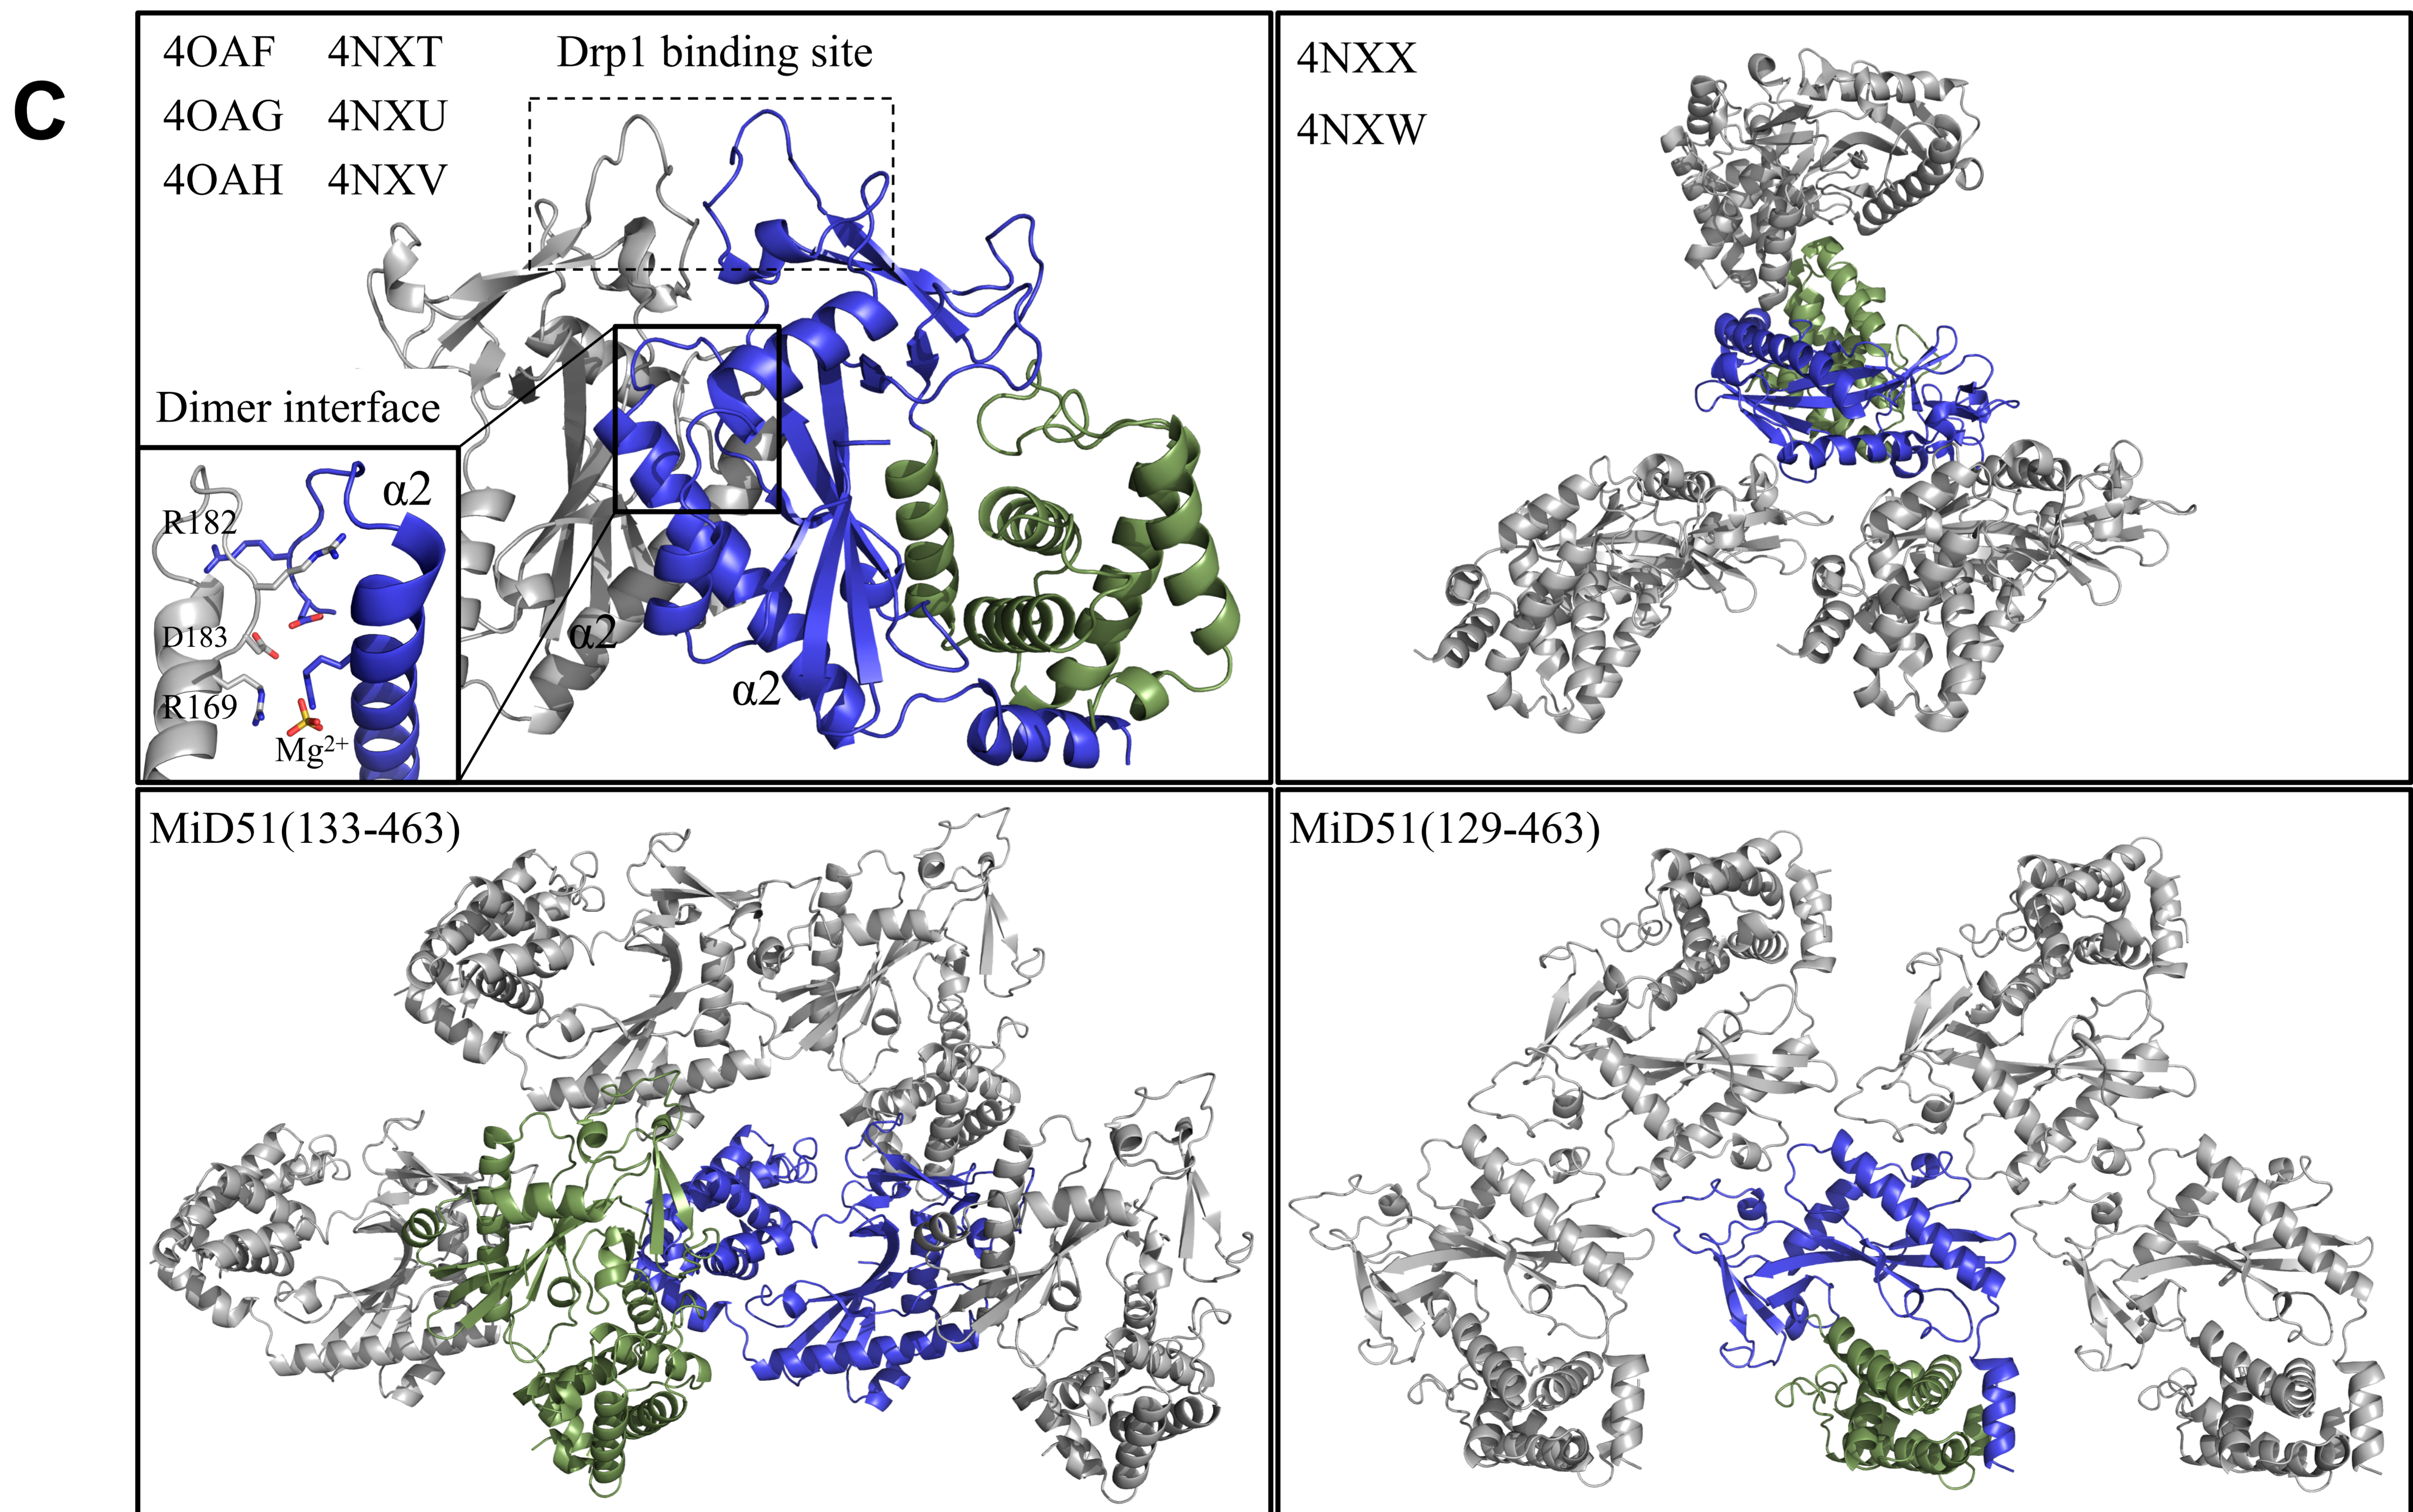

Supplement: pone.0211459.s001.pdf [file pone.0211459.s001.pdf]
