# Supplementary material for: New interfaces on MiD51 for Drp1 recruitment and regulation
Source: PubMed Central journal article supplement (PMC6355003; doi:10.1371/journal.pone.0211459), 2019-01-31
Supplement: pone.0211459.s002.pdf [file pone.0211459.s002.pdf]

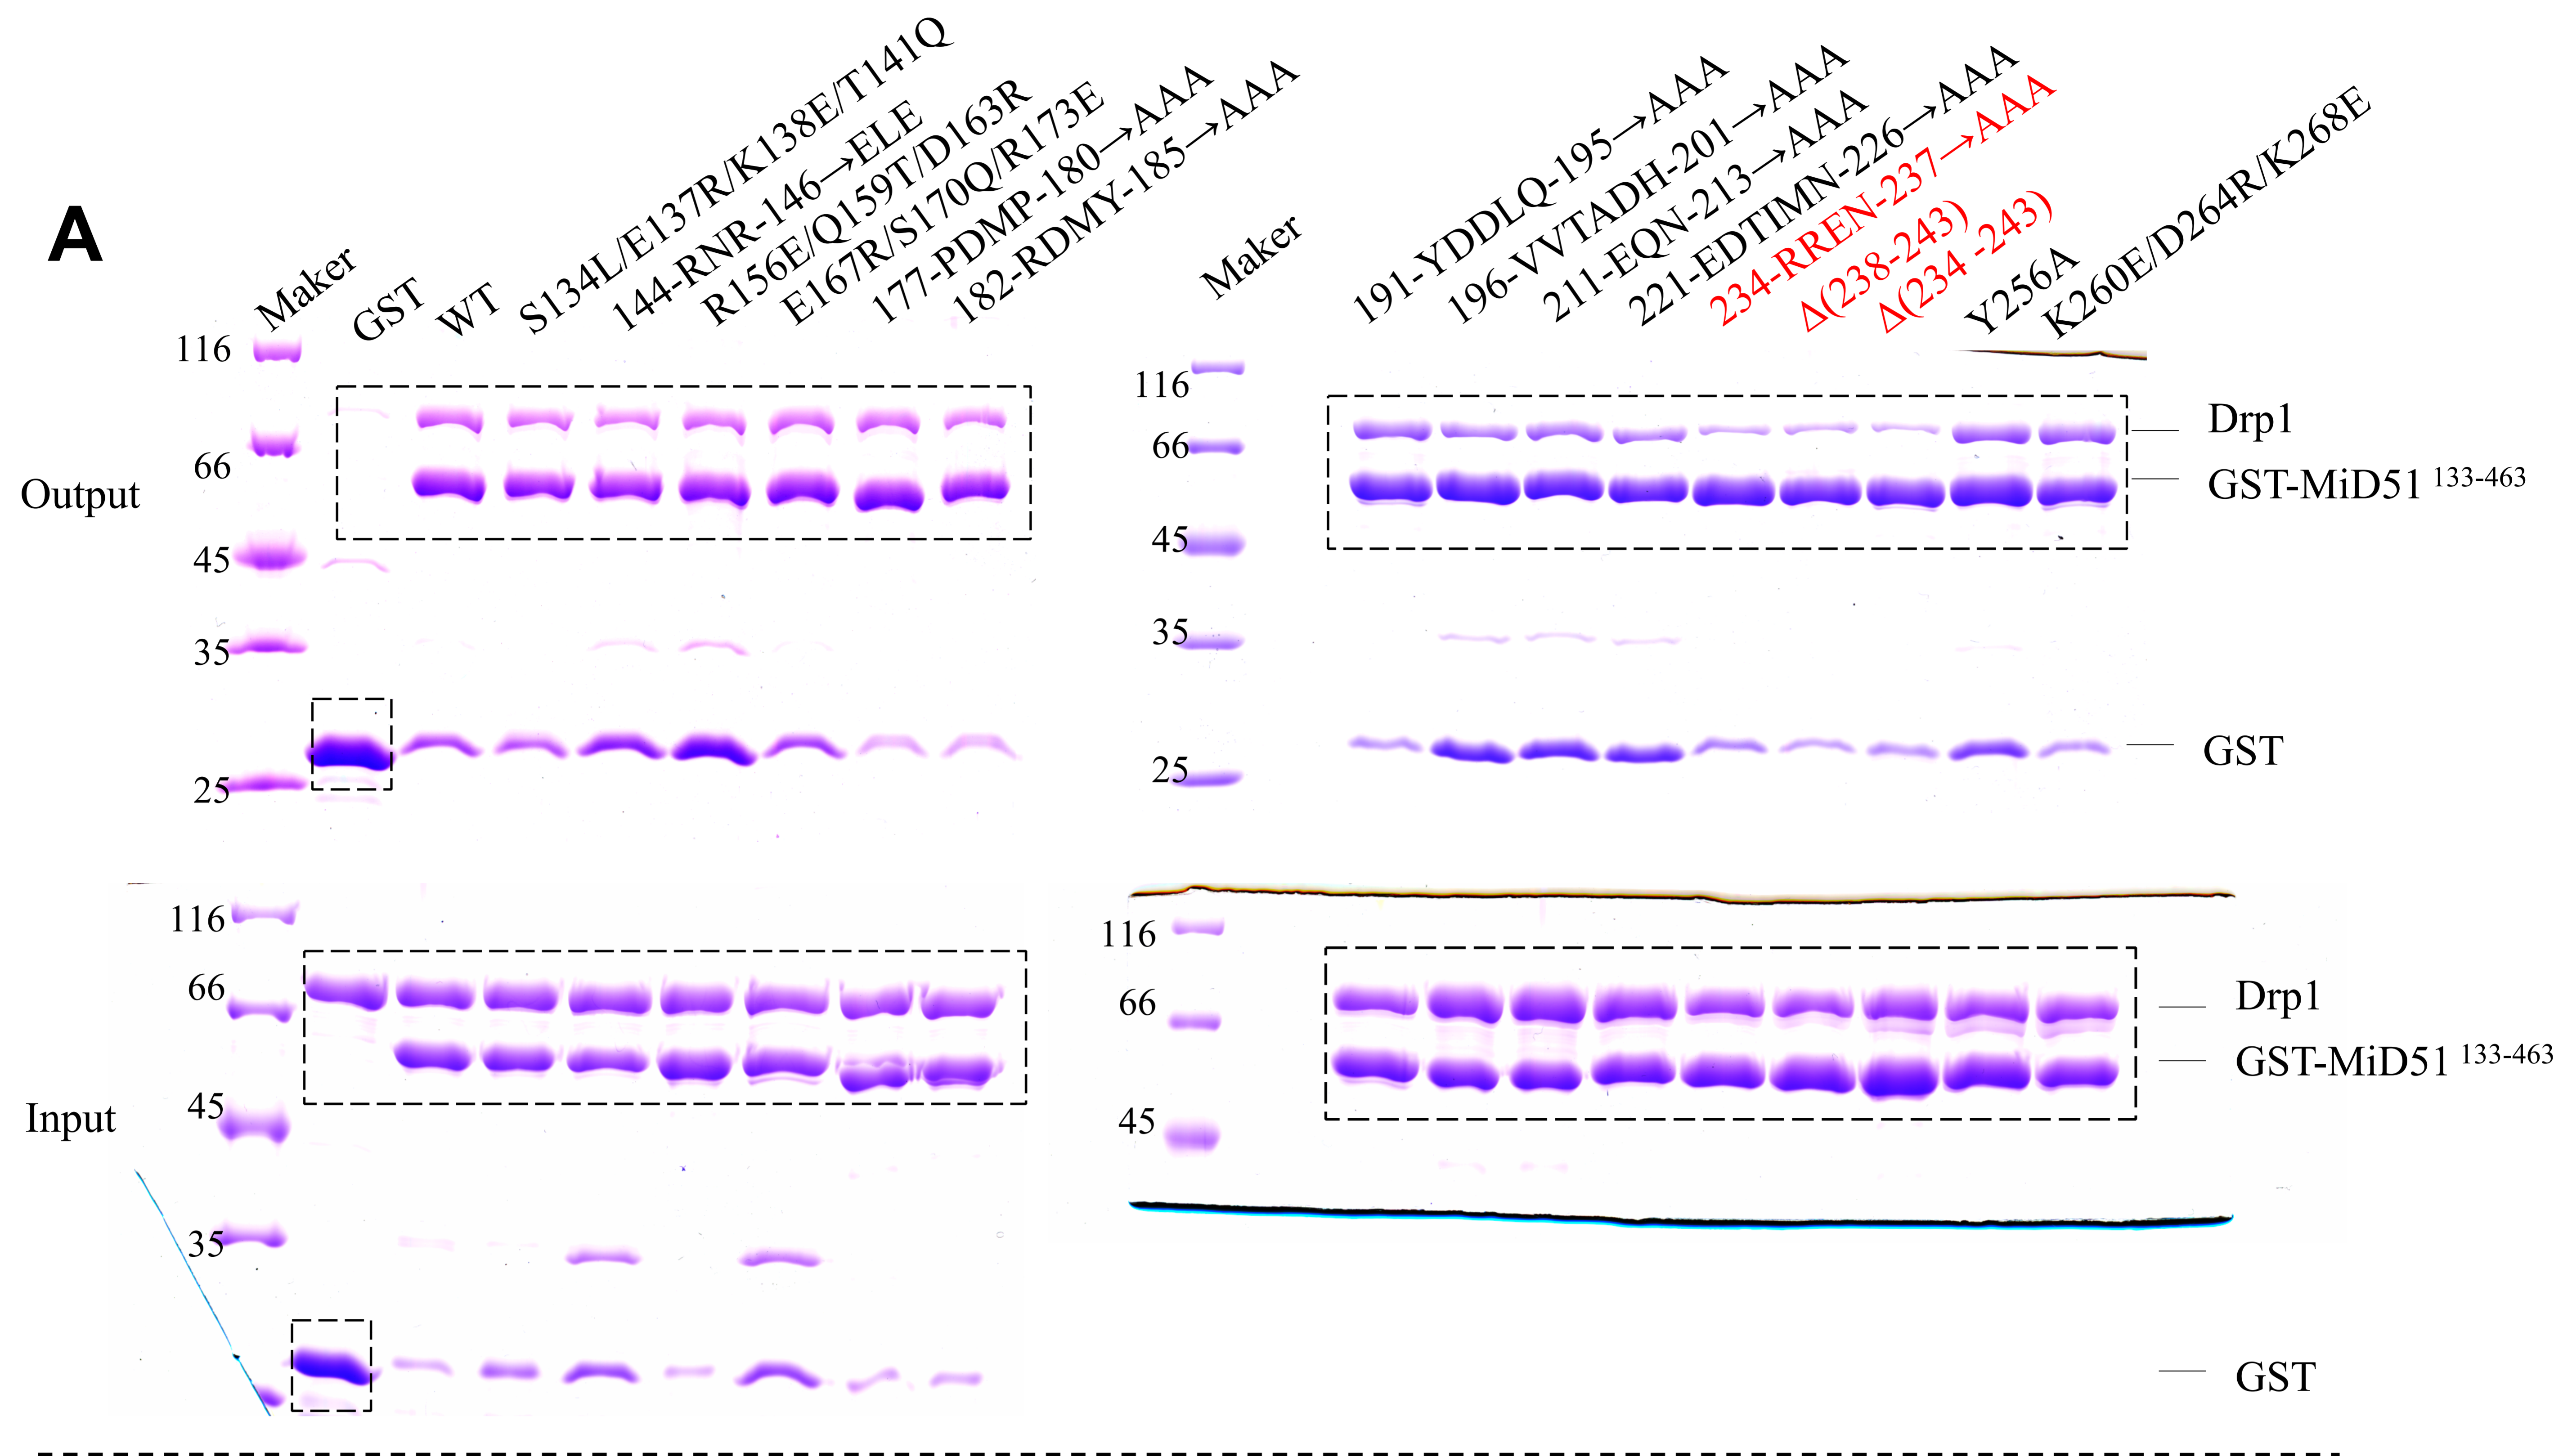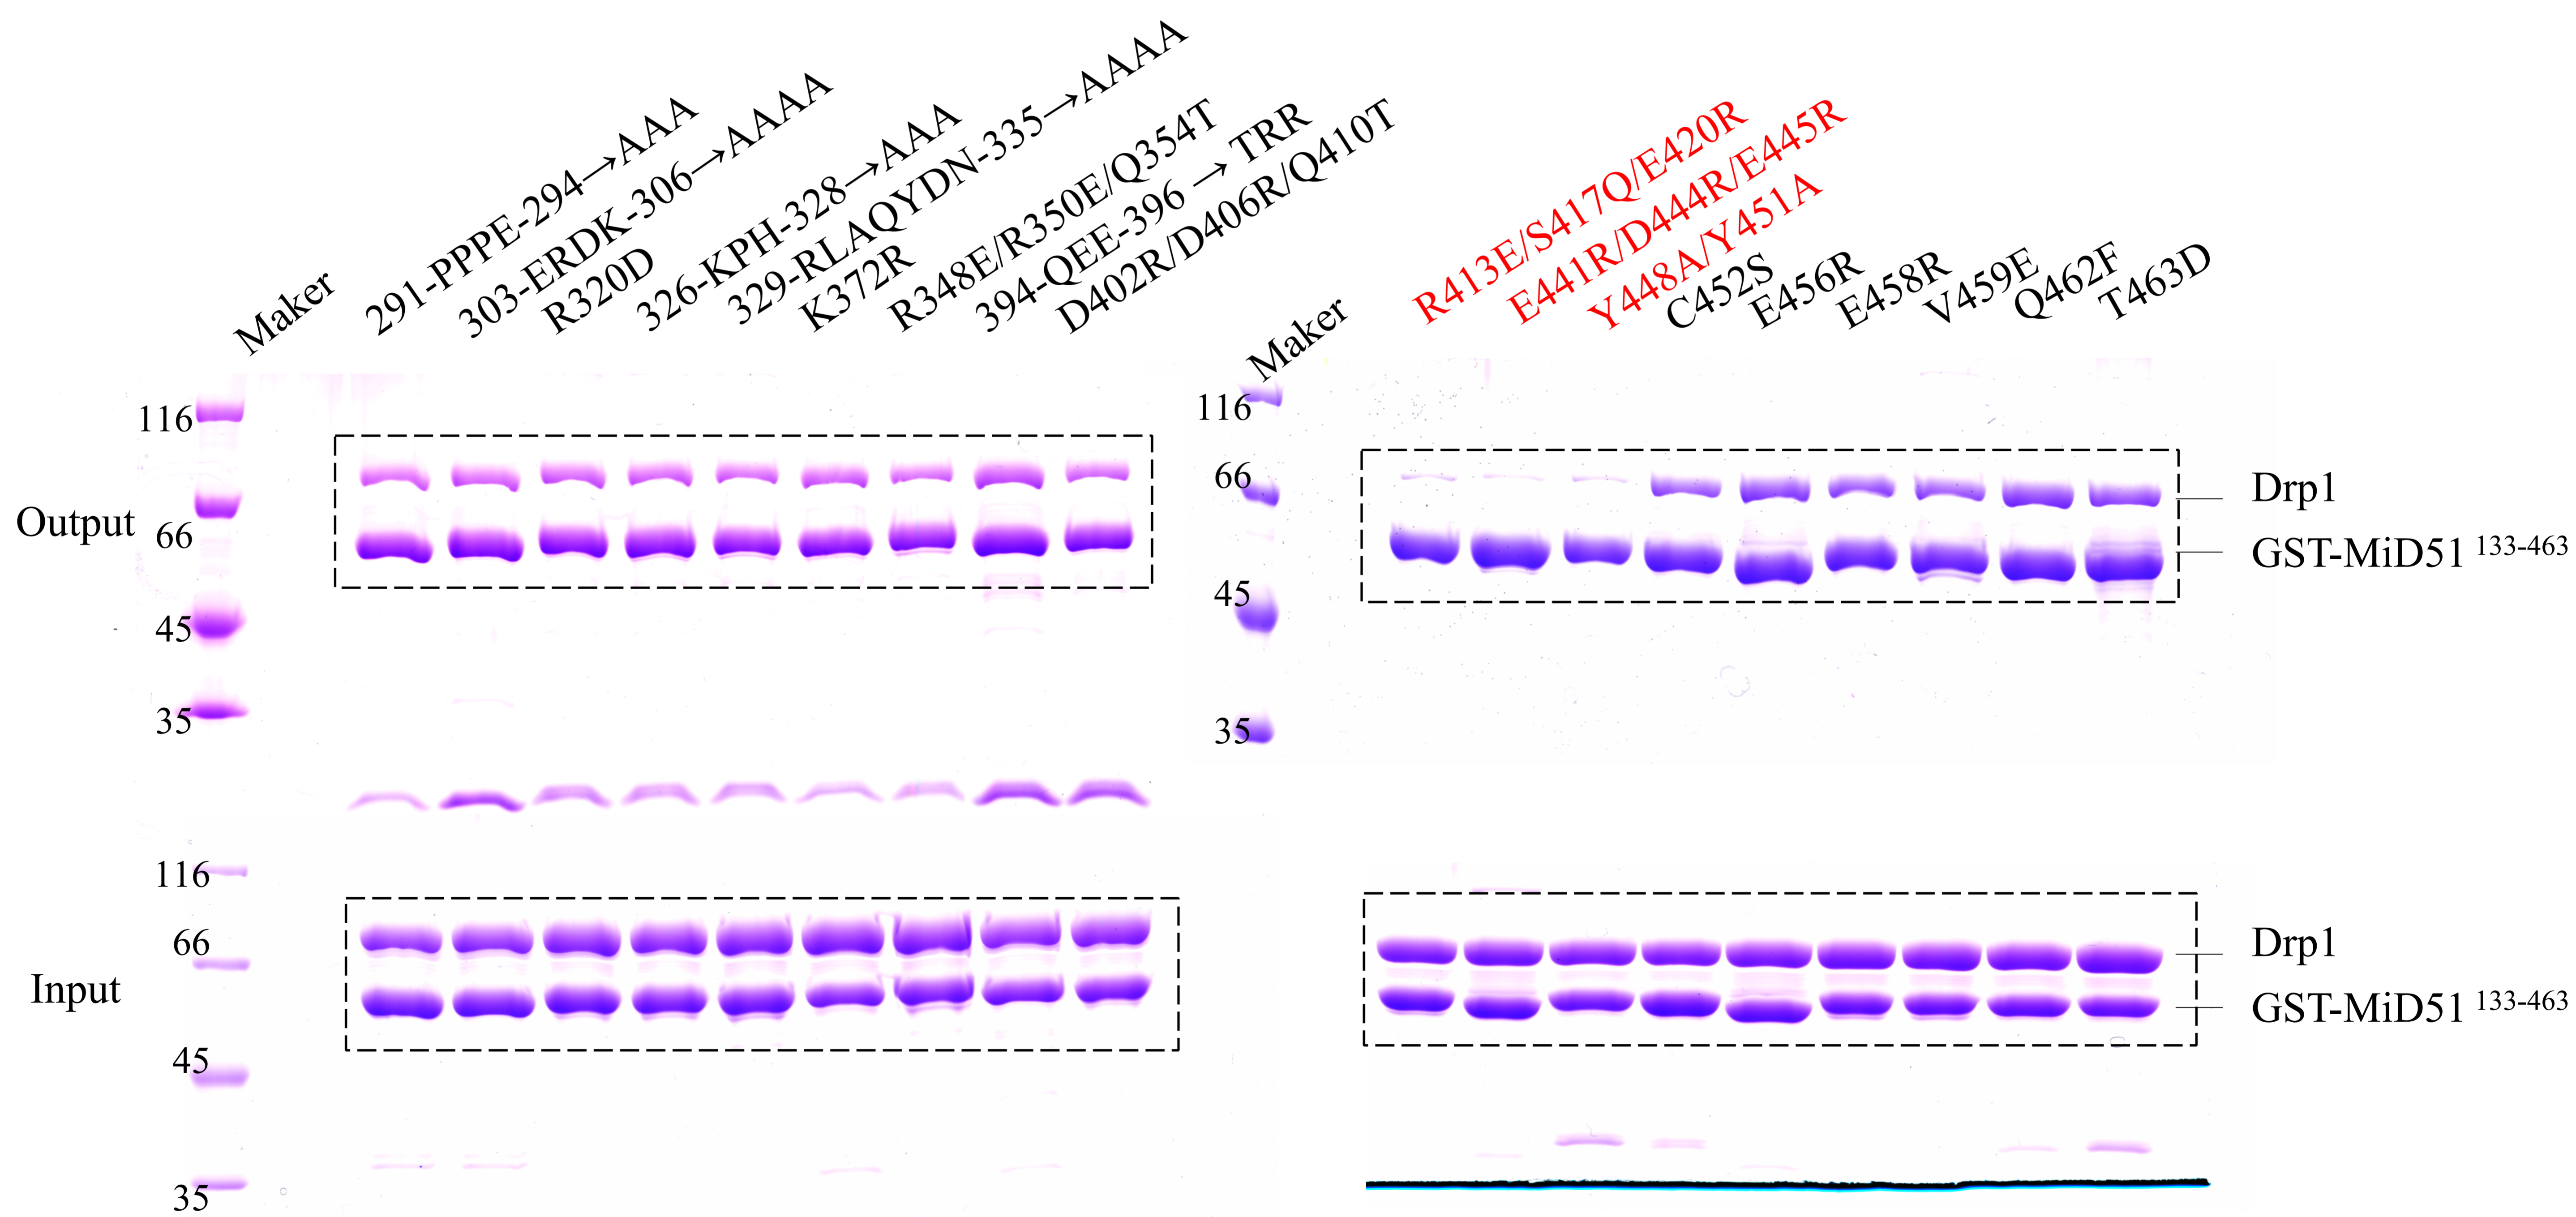

**B**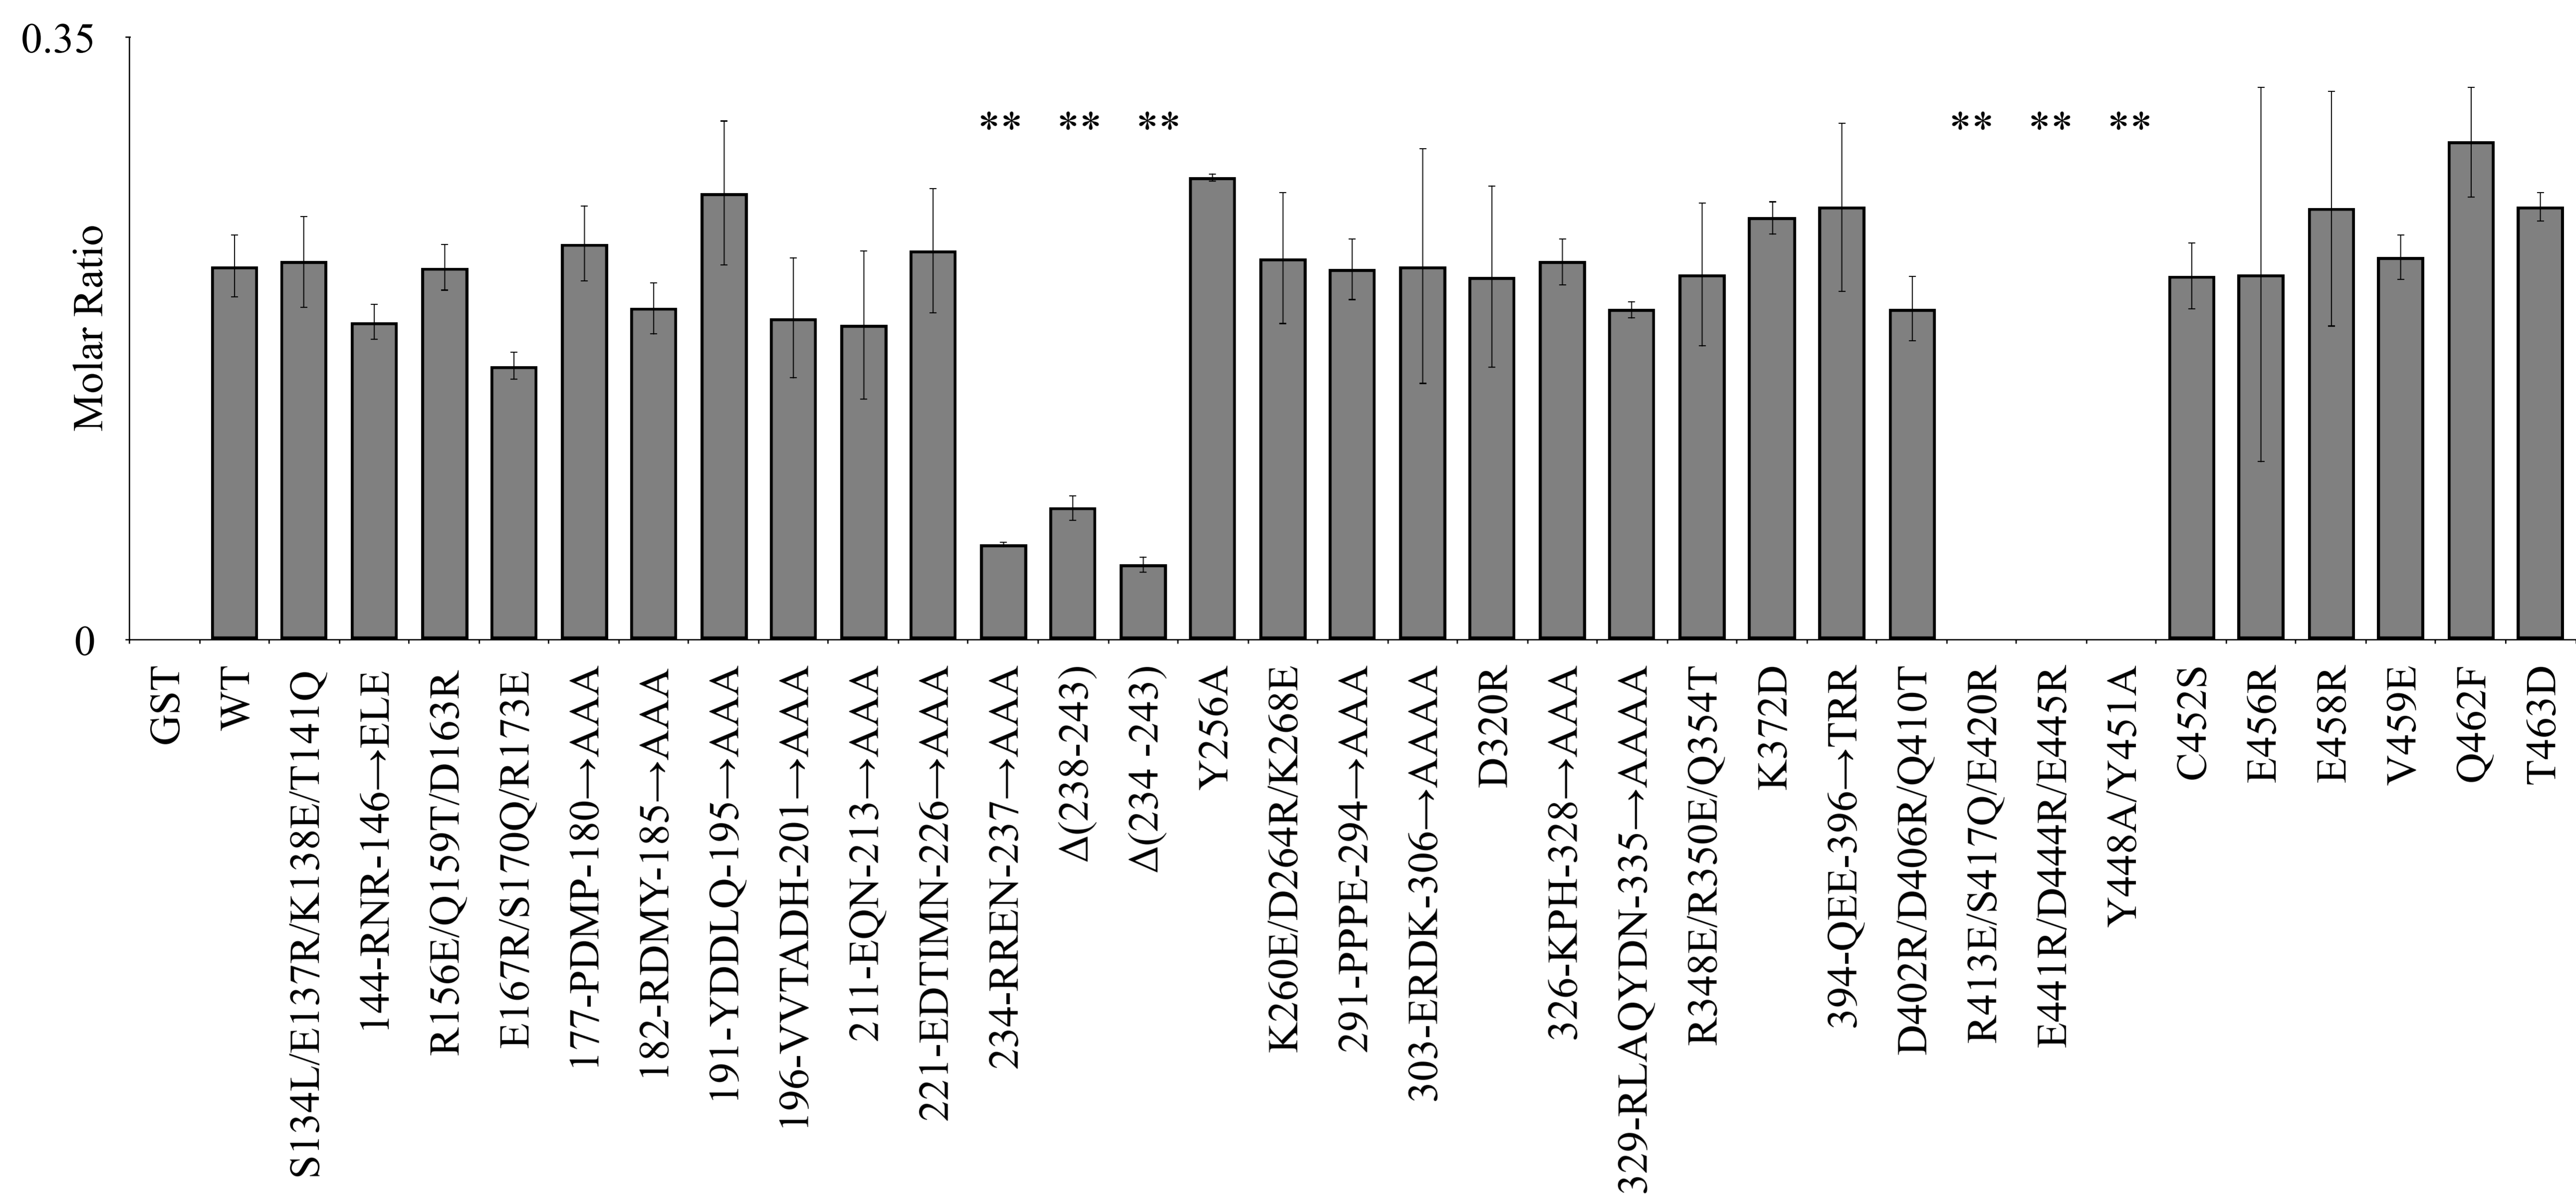**C**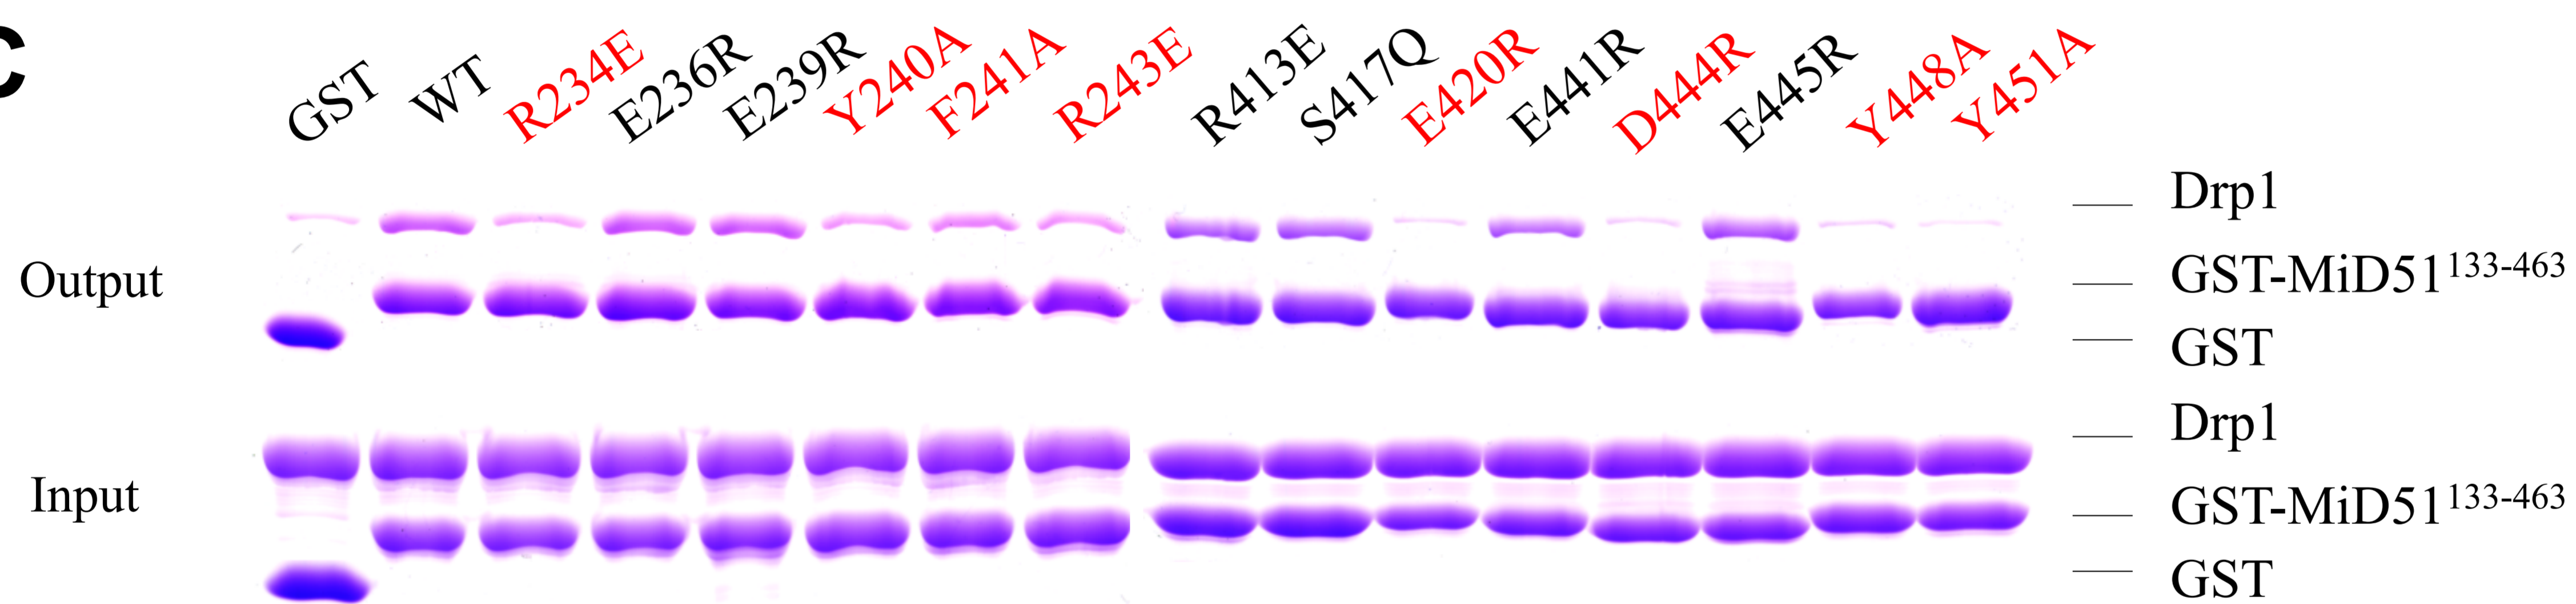**D**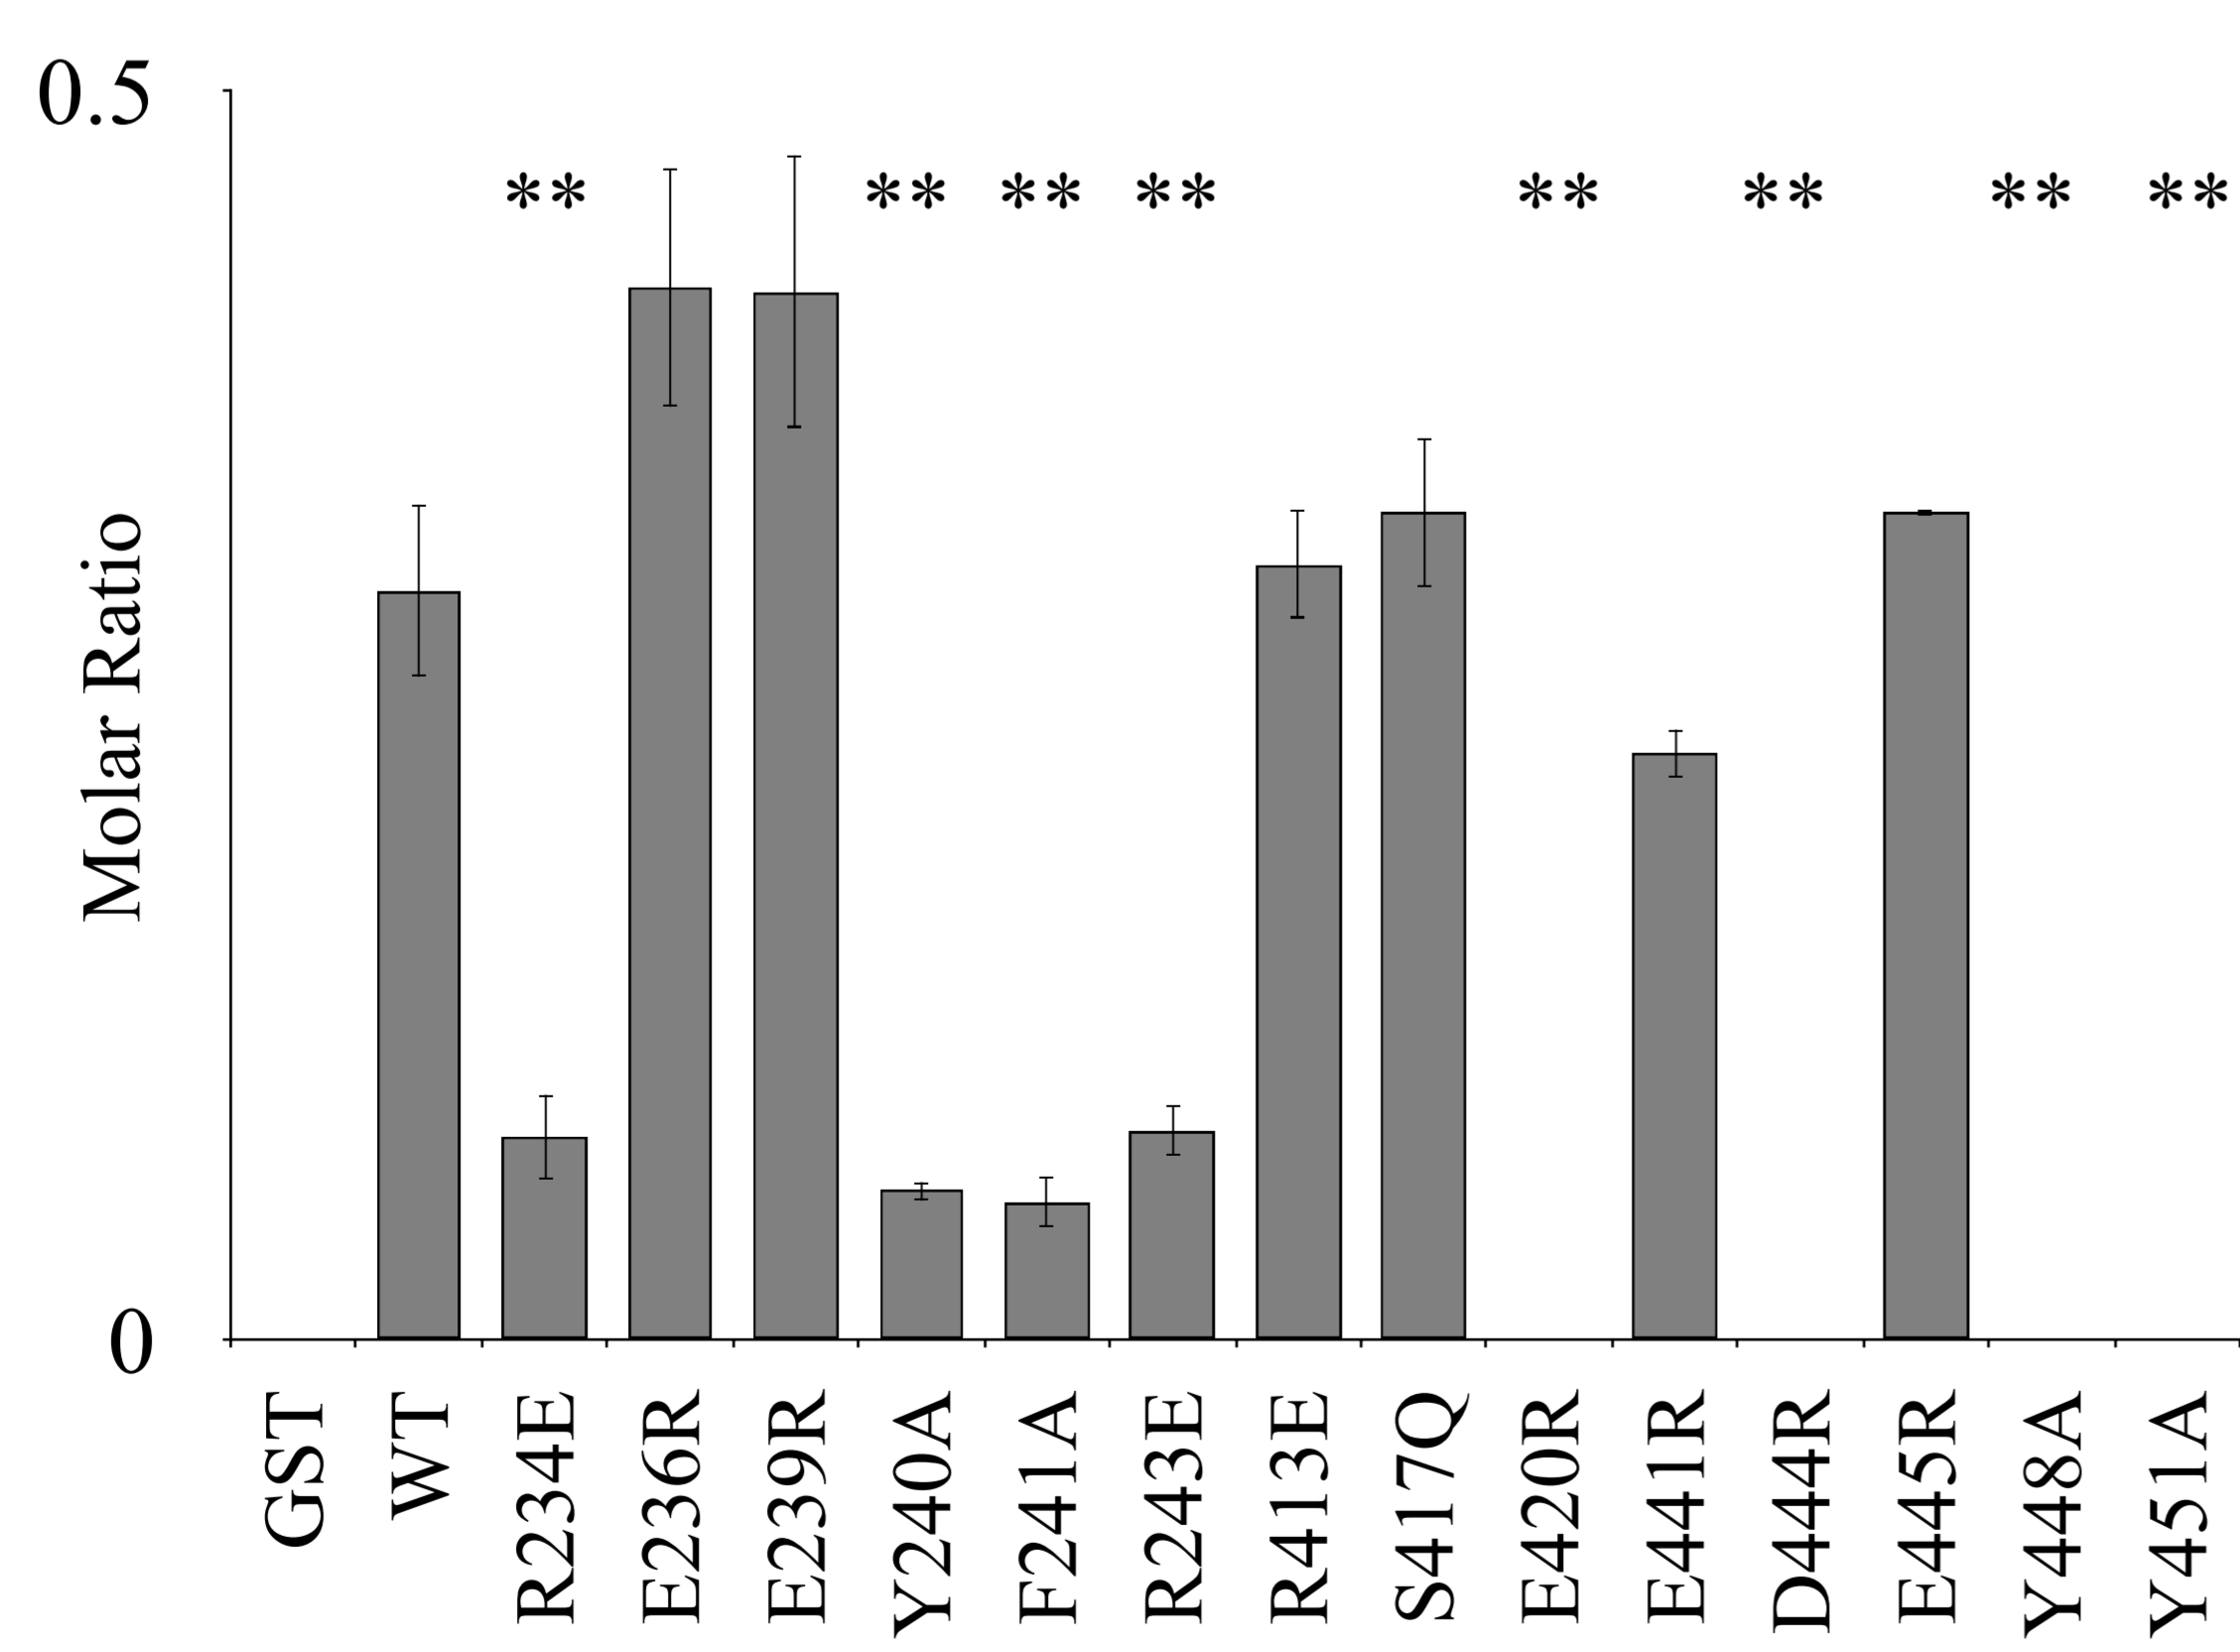**E**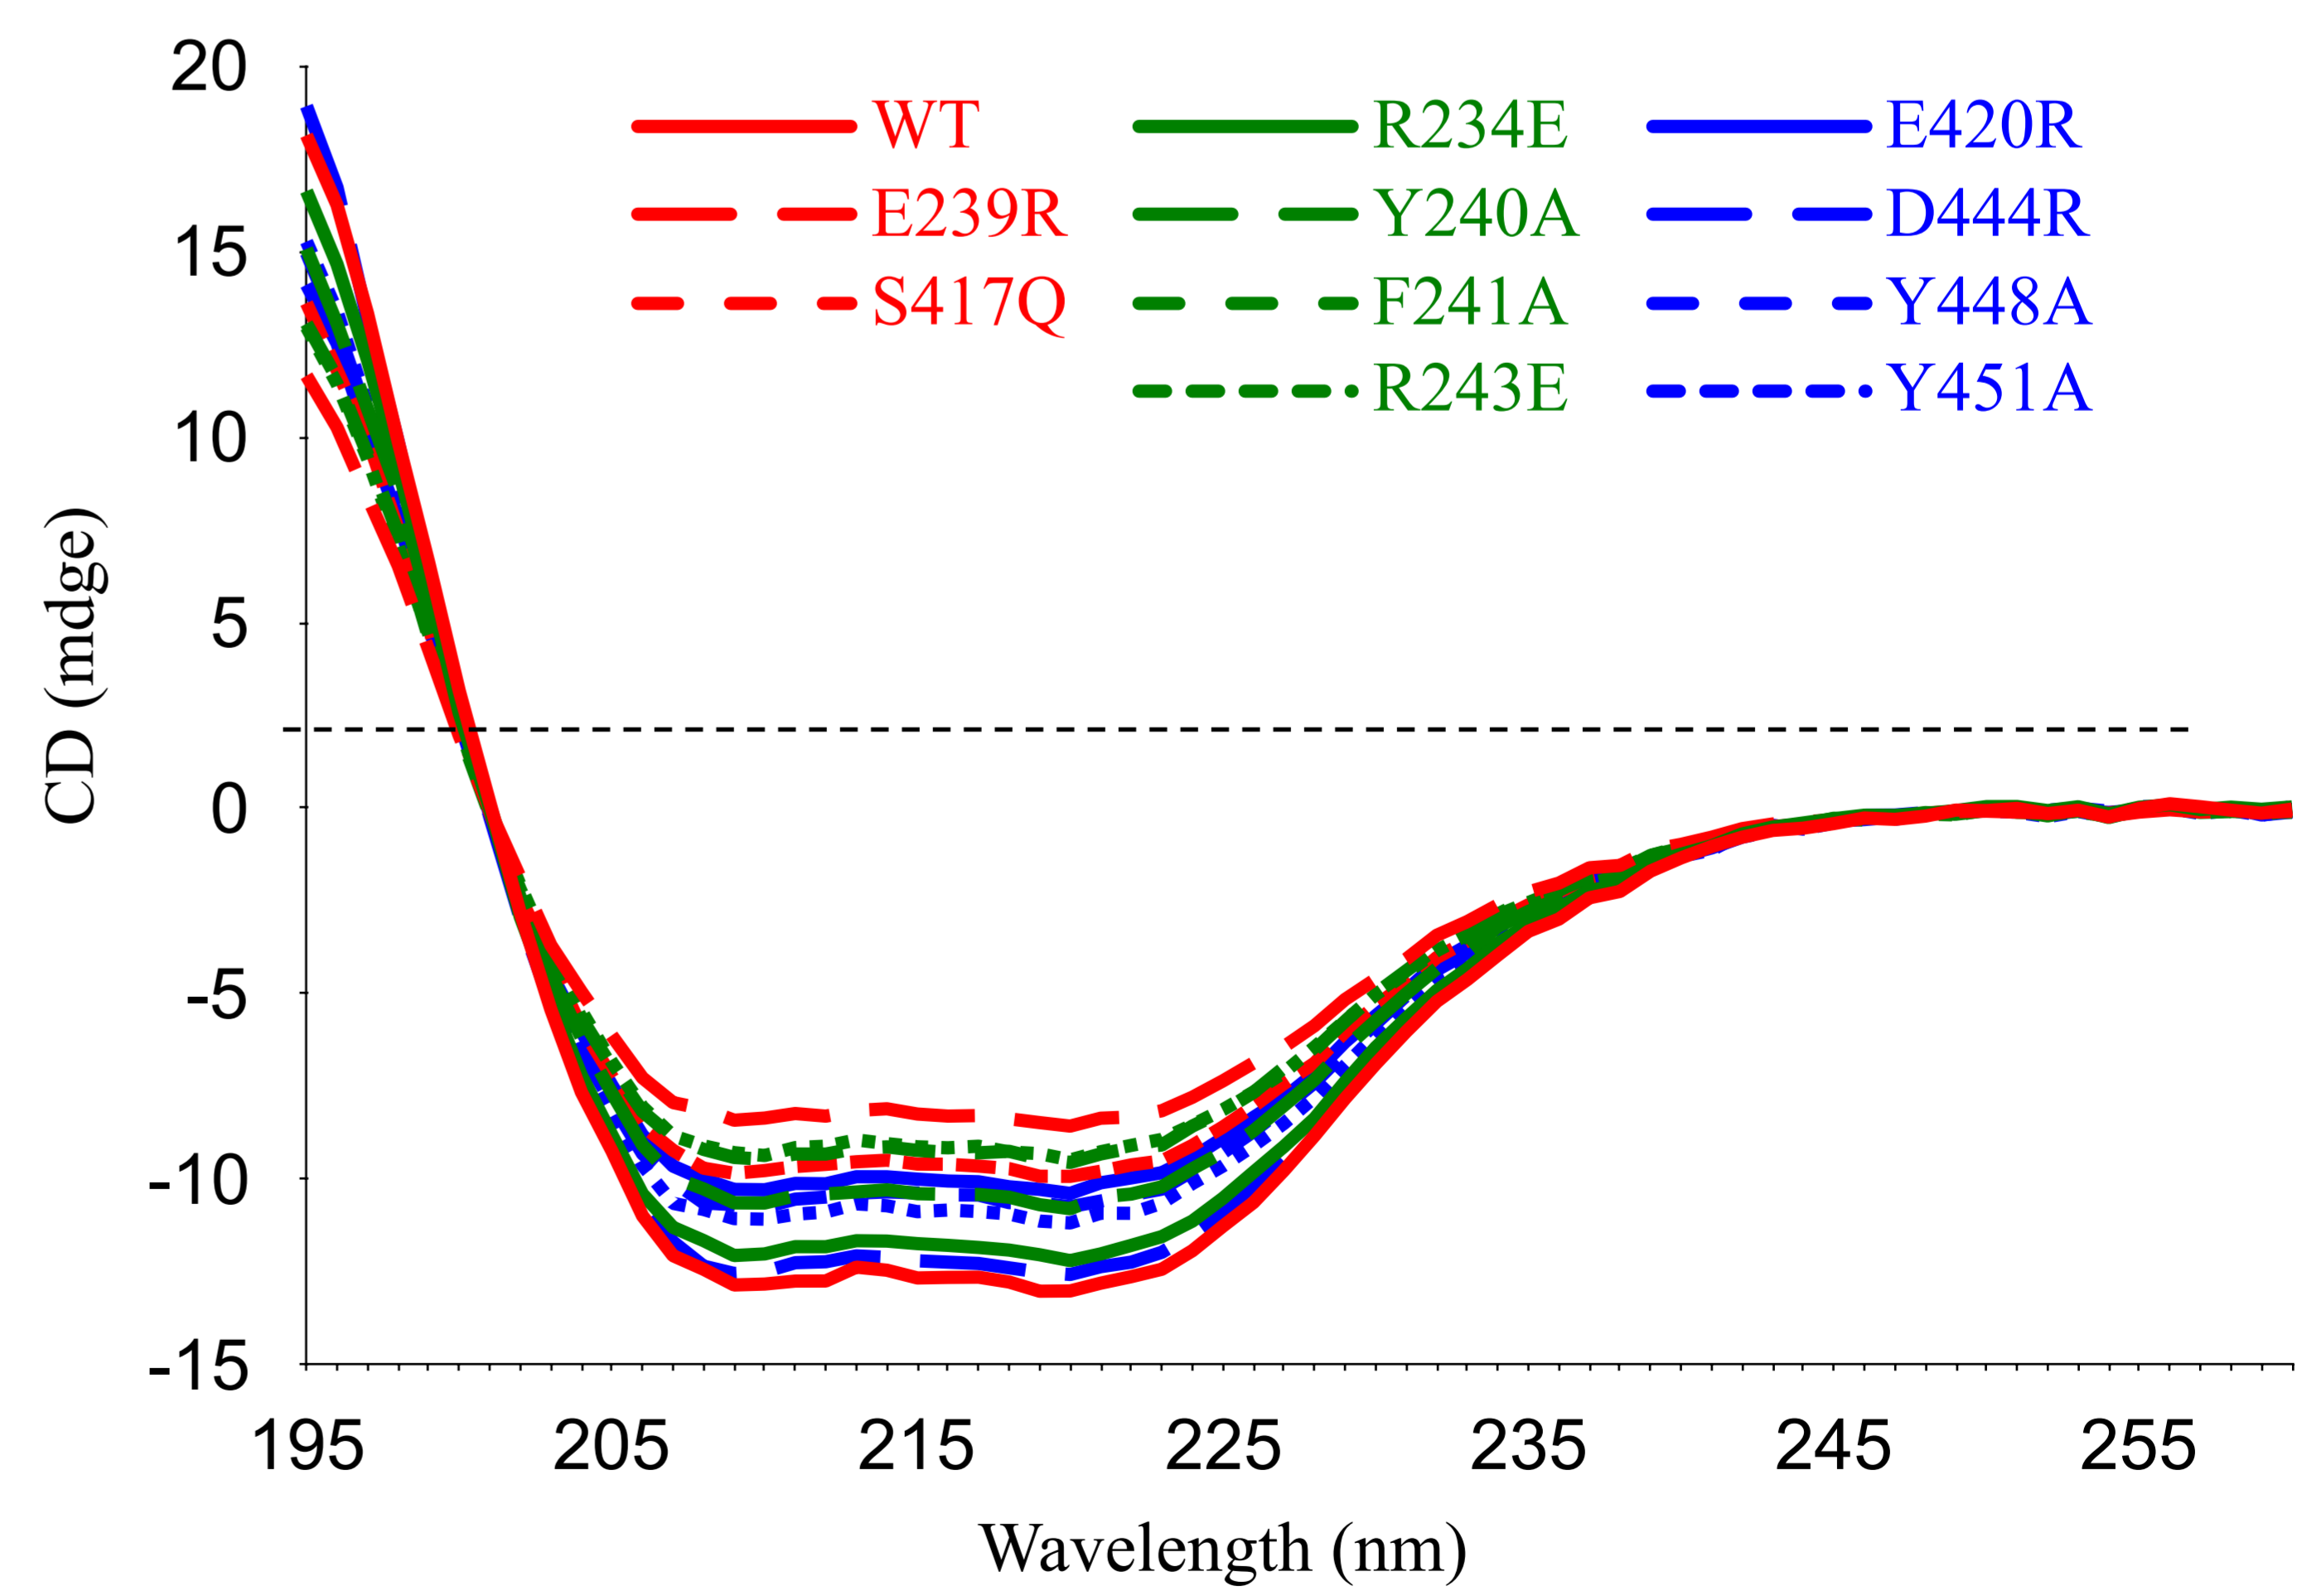

**F**

|           |            |            |            |             |            |            |            |            |            |           |            |       |       |        |
|-----------|------------|------------|------------|-------------|------------|------------|------------|------------|------------|-----------|------------|-------|-------|--------|
| MiD51     | Human      | 1          | MAGA-GERKG | KKDDN       | GIGTA      | IDFVLSNARL | VLGVGGAAML | GIATLAVKRM | YDRAIS     | SAPTS     | PTRLSHS    | GKR   | SWEE  | PNWMGS |
|           | Chimpanzee | 1          | MAGA-GERKG | KKDDN       | GIGTA      | IDFVLSNARL | VLGVGGAAML | GIATLAVKRM | YDRAIS     | SAPTS     | PTRLSHS    | GKR   | SWEE  | PNWMGS |
|           | Monkey     | 1          | MAGA-GERKG | KKDDN       | GIGTA      | IDFVLSNARL | VLGVGGAAML | GIATLAVKRM | YDRAIS     | SAPTS     | PTRLSHS    | GKR   | SWEE  | PNWMGS |
|           | Cattle     | 1          | MAGS-GERKS | KKDDN       | GIGTA      | IDFVLSNARL | VLGVGGAAML | GIATLAVKRM | YDRAIS     | SAPTS     | PTRLSHS    | GKR   | SWEE  | PNWMGS |
|           | Pig        | 1          | MAGA-GERKS | KKDDN       | GIGTA      | IDFVLSNARL | VLGVGGAAML | GIATLAVKRM | YDRAIS     | SAPTS     | PTRLSHS    | GKR   | SWEE  | PNWMGS |
|           | Camel      | 1          | MAGA-GERKS | KKDDN       | GIGTA      | IDFVLSNARL | VLGVGGAAML | GIATLAVKRM | YDRAIS     | SAPTS     | PTRLSHAG   | GKR   | SWEE  | PNWMGS |
|           | Dog        | 1          | MAGS-GERKG | KKDDN       | GIGTA      | IDFVLSNARL | VLGVGGAAML | GIATLAVKRM | YDRAIS     | SAPTS     | PTRLSHS    | GKR   | SWEE  | PNWMGS |
|           | Rat        | 1          | MAGA-GERKG | KKDDN       | GIGTA      | IDFVLSNARL | VLGVGGAAML | GIATLAVKRM | YDRAIS     | SAPTS     | PTRLSHS    | GKR   | SWEE  | PNWMGS |
|           | Mouse      | 1          | MAGA-GERKG | KKDDN       | GIGTA      | IDFVLSNARL | VLGVGGAAML | GIATLAVKRM | YDRAIS     | SAPTS     | PTRLSHS    | GKR   | SWEE  | PNWMGS |
|           | Chicken    | 1          | MAGA-GPRKG | KKDDN       | GIGTA      | IDFVLSNARL | VLGVGGAAML | GIATLAVKRM | YDRAIS     | SAPSS     | PTRLNQS    | GKR   | SWEE  | PNWLGS |
|           | Frog       | 1          | MAGA-GERKG | KKDDN       | GIGTA      | IDFVLSNARL | VLGVGGAAML | GIATLAVKRM | YDRAIS     | SAPTS     | PTRLSHS    | GKR   | SWEE  | PNWMGS |
|           | Zebrafish  | 1          | MAGVNGDRKG | KKDDN       | GLGTA      | IDFVLSNAKL | VLGVGGAAML | GIATLAVKRM | YDRALS     | SAPSS     | PTKADPS    | GRR   | SWEE  | PSWLGS |
|           | MiD49      | Human      | 1          | MAEFSQKRK   | RRSDEGLGSM | VDFLANARL  | VLGVGGAAVL | GIATLAVKRF | IDRATS     | SPRD      | --EDDTKAD  | --    | SWKEL | ----   |
|           |            | Chimpanzee | 1          | MAEFSQKRK   | RRSDEGLGSM | VDFLANARL  | VLGVGGAAVL | GIATLAVKRF | IDRATS     | SPRD      | --EDDTKAD  | --    | SWKEL | ----   |
|           |            | Cattle     | 1          | MAEFSQNRK   | RRDGEVLGGA | VDFLANARL  | VLGVGGAAVL | GIATLAVKRL | IDRATS     | SPRD      | --EDDTKGD  | PCLED | SWQDL | ----   |
|           |            | Camel      | 1          | MAELSQNRK   | RRDGEVLGGA | VDFLANARL  | VLGVGGAAVL | GIATLAVKRL | IDRATS     | SRD       | --EDDVKGDA | TCLED | SWKEL | ----   |
| Dog       |            | 1          | MAEFSQKRK  | QRD-EVLGST  | VDFLANARL  | VLGVGGAAVL | GIATLAVKRL | IDRATS     | SPRD       | --EDDAKGD | TRLED      | SWKEL | ----  |        |
| Cat       |            | 1          | MAEFSQKRGR | QRD-EVLGST  | VDFLANARL  | VLGVGGAAVL | GIATLAVKRL | IDRATS     | SPRD       | --EDDAKGD | TCLED      | SWKEL | ----  |        |
| Squirrel  |            | 1          | MAEFSQKRK  | RRDGEGLGSV  | VDFLANARL  | VLGVGGAAVL | GIATLAVKRF | IDRATS     | SPRD       | --EDDTKGD | --         | SWKEL | ----  |        |
| Mouse     |            | 1          | MAEFSQQRK  | QSGSEGLGSV  | VDFLANARL  | VLGVGGAAVL | GIATLAVKRL | IDRATS     | SPD        | --EDDTKGD | --         | SWKEL | ----  |        |
| Rat       |            | 1          | MAEFSQQRK  | QHGGSEGLGSV | VDFLANARL  | VLGVGGAAVL | GIATLAVKRL | IDRATS     | NPRD       | --EDDTKGD | --         | SWKEL | ----  |        |
| Frog      |            | 1          | MAELQIRKKE | KKSGDGIGTM  | VDFLANARL  | VLGVGGAAML | GIATLAVKRL | IDRATS     | PPSD       | -KEAEKAEQ | --         | KSIEE | SWKEA |        |
| Zebrafish | 1          | MYYS-GKRRG | --EDGIAAV  | IDFLSNARL   | VLGVGGAAVL | GIATLAVKRL | IERAGR     | PPDE       | --EPDKKMTD | --        | SWBEL      | SLVSA |       |        |

|           |            |            |            |            |            |             |            |            |             |            |
|-----------|------------|------------|------------|------------|------------|-------------|------------|------------|-------------|------------|
| MiD51     | Human      | 80         | P-RLNDRMK  | TGLSRSLQTL | PTDSSTFDTD | TFCPPRPKPV  | ARKGQVDLKK | SRLR--MSL  | QEKLLTYRNN  | RAAIPAGEQA |
|           | Chimpanzee | 80         | P-RLNDRMK  | TGLSRSLQTL | STDSSAFDTD | TFCPPRPKPV  | ARKGQVDLKK | SRLR--MSL  | QEKLLTYRNN  | RAAIPAGEQA |
|           | Monkey     | 80         | P-RLNDRMK  | TGLSRSLQTL | PTDSSTFDTD | TFCPPRPKPM  | ARKGQVDLKK | SRLR--MSL  | QEKLLTYRNN  | RAAIPAGEQA |
|           | Cattle     | 80         | P-RLNKDMK  | AGLSRSLQAL | PTGSSAFDTD | TFCPPRPKPL  | ARKGQVDLKK | SRLR--MSL  | QEKLLTYRNN  | RAAIPAGEQA |
|           | Pig        | 80         | P-RLNKDMK  | TGLSRSLQTL | PTGSSAFDTD | TFCPPRPKPL  | ARKGQVDLKK | SRLR--MSL  | QEKLLTYRNN  | RAAIPAGEQA |
|           | Camel      | 80         | P-RLNKDMK  | TGLSRSLQTL | PTDPTAFDTD | TFCPPRPKPL  | ARKGQVDLKK | SRLR--MSL  | QEKLLTYRNN  | RAAIPAGEQA |
|           | Dog        | 80         | P-RLNKDMK  | TGLSRSLQTL | PTDSSAFDAD | TFCPPRPKPL  | ARKGQVDLKK | SRLR--MSL  | QEKLLTYRNN  | RAAIPAGEQA |
|           | Rat        | 80         | P-RLNDRMK  | TGLSRSLQTL | PTDSSAFDTD | TFCPPRPKPL  | ARRGQVDLKK | SRLR--MSL  | QEKLLSYRNN  | RAAIPAGEQA |
|           | Mouse      | 80         | P-RLNKDMK  | AGLSRSLQTL | PTDSSAFDTD | TFCPPRPKPL  | ARRGQVDLKK | SRLR--MSL  | QEKLLSYRNN  | RAAIPAGEQA |
|           | Chicken    | 80         | SSRLLSQDMK | TNLSRSLQTL | PTESSATDTD | FFRPTKPKPS  | AKRSQVELKK | SRLR--LSL  | QEKLFAYYRR  | KVAIPTDEQA |
|           | Frog       | 80         | P-RLNDRMK  | TGLSRSLQTL | PTDSSTFDTD | TFCPPRPKPV  | ARKGQVDLKK | SRLR--MSL  | QEKLLTYRNN  | RAAIPAGEQA |
|           | Zebrafish  | 81         | SPRTTNHDMK | QNVSRSLQTL | PTSSSSFKPD | SLHRGLARG-  | GRPAKAELQR | ARLR--LSL  | QEHLDWAFHE  | RVTIPSEEQS |
| MiD49     | Human      | 72         | S--LLKATPH | LQPRPPAAL  | SQPVLPLAPS | SSAPEGPAET  | DPEVTPQLSS | PAPL--CLTL | QERLLAFERD  | RVTIPAAQVA |
|           | Chimpanzee | 72         | S--LLKATPH | LQPRPPAAL  | SQPVLPLVPS | SSAPEGPAET  | DPEVTPQLSS | PAPL--CLTL | QERLLAFERD  | RVTIPAAQVA |
|           | Cattle     | 78         | S--LLKATPR | LQSRPPAAL  | SQPVPPAPPS | LSAPEGPADT  | GPQTSPLISS | PAPPL-CLTF | QEKLLAFEQD  | HVTVPGAHVS |
|           | Camel      | 78         | S--LLKATPH | LQPRPPAAL  | SQPTPLPAPS | PSTPAGPAGA  | DAPGAPRISS | PAPP--CLTF | QEKLLAFEQD  | HVTIPVAHVA |
|           | Dog        | 77         | N--LLTATPR | QQPRPPAAL  | SQPVSPPDPS | PAAPGPTDT   | GPEMSLQLSS | PAPL--CLTF | QEKLLAFEQT  | HVTIPAAHVA |
|           | Cat        | 77         | T--LLKTPR  | LQPRTPAAL  | SQPASLPAPL | PSAPEGPSDT  | EPQPLPQSS  | PAPL--CLTF | QEKLLVFERD  | HVTIPEAHVA |
|           | Squirrel   | 72         | S--LLKSTPH | LQPRPPAAP  | SQPVLPLIPS | PSAPEEPAET  | DLQVTPQLSS | PAPL--CLTL | QERLLAFERD  | RVTIPAAQVA |
|           | Mouse      | 72         | S--LLRATSP | QKPQPPAAF  | SQPLATGSPS | PSVPVEPTPI  | HSPTTPKFST | IAPL--CLTF | QERLLAFERK  | HVITPEAHVT |
|           | Rat        | 72         | S--LLRATSH | PKPQSPAAF  | SQPKSPVSPS | PSAPVGPPTPT | HSQTPPKLSS | VAPL--CLTF | QEKLLAFERN  | HVIVPEAHVT |
|           | Frog       | 75         | V--LKKASPT | LRRKEDLEHH | CAPLSLPDPS | QKMPPEATGTS | QVKASDEIK- | KIPI--CFTL | QERLLNYHHTH | HASVPEVQME |
| Zebrafish | 80         | SPKLLHKGIE | GVVMKQIAAA | TKKAELSQPI | PMPSEPRQC  | DADPPFPQRR  | KRMDLCVLT  | ADRLQQYR   | RVCLSAAEVC  |            |

|           |            |            |             |             |            |             |            |            |             |             |
|-----------|------------|------------|-------------|-------------|------------|-------------|------------|------------|-------------|-------------|
| MiD51     | Human      | 156        | RAKQAAVDIC  | AELRSFLRAK  | IPDMPLRDMY | LSGSLYDDLQ  | VVTADHIQLI | VPLVLEQNLW | SCIPGEDTIM  | NVPGFFLVRR  |
|           | Chimpanzee | 156        | RAKQAAVDIC  | AELRSFLRAK  | IPDMPLRDMY | LSGSLYDDLQ  | VVTADHIQLI | VPLVLEQNLW | SCIPGEDTIM  | NVPGFFLVRR  |
|           | Monkey     | 156        | RAKQAAVDIC  | AELRSFLRAK  | IPDMPLRDMY | LSGSLYDDLQ  | VVAADHIQLI | VPLVLEQNLW | SCIPGEDTIM  | NVPGFFLVRR  |
|           | Cattle     | 156        | RAKQAAVDIC  | AELRSFLRAK  | IPDMPLRDMY | LSGSLYDDLQ  | VVTADHIQLI | VPLVLEQNLW | SCIPGEDTIM  | NVPGFFLVRR  |
|           | Pig        | 156        | RAKQAAVDIC  | AELRSFLRAK  | IPDMPLRDMY | LSGSLYDDLQ  | VVTADHIQLI | VPLVLEQNLW | SCVPGEDTIM  | NVPGFFLVRR  |
|           | Camel      | 156        | RAKQAAVDIC  | AELRSFLRAK  | IPDMPLRDMY | LSGSLCDDLQ  | VVTADHIQLI | VPLVLEQNLW | SCIPGEDTIM  | NVPGFFLVRR  |
|           | Dog        | 156        | RAKQAAVDIC  | AELRSFLRAK  | IPDMPLRDMY | LSGSLYDDLQ  | VVTADHIQLI | VPLVLEQNLW | SCIPGEDTIM  | NVPGFFLVRR  |
|           | Rat        | 156        | RAKQAAVDIC  | AELRSFLRAK  | IPDMPLRDMY | LSGSLYDDLQ  | VVTADHIQLI | VPLVLEQNLW | SCIPGEDTIM  | NIPGFFLVRR  |
|           | Mouse      | 156        | RAKQAAVDIC  | AELRSFLRAK  | IPDMPLRDMY | LSGSLYDDLQ  | VVTADHIQLI | VPLVLEQNLW | SCIPGEDTIM  | NVPGFFLVRR  |
|           | Chicken    | 157        | LAKQAAVDIC  | AELRSFLRAK  | IPDMPLRDMY | LSGSLYDDLQ  | VVTADHIQLI | VPLMLEQNLW | SCIPGEETIM  | NIPGFFLVRR  |
|           | Frog       | 156        | RAKQAAVDIC  | AELRSFLRAK  | IPDMPLRDMY | LSGSLYDDLQ  | VVTADHIQLI | VPLVLEQNLW | SCIPGEDTIM  | NVPGFFLVRR  |
|           | Zebrafish  | 157        | VARRAALDIC  | AELRVFLHAK  | IPDMPLREMY | LSGSLYDDLQ  | VVTADHAQLM | VPLHLEKNLW | SSIPGEDTIM  | NIPGFFSLVRR |
| MiD49     | Human      | 148        | LAKQLAGDIA  | LELQAYFRSK  | FPELPFGAFV | PGGPLYDGLQ  | AGAADHVRLL | VPLVLEPGLW | SLVPGVDTVA  | RDPRCWAARR  |
|           | Chimpanzee | 148        | LAKQLAGDIA  | LELQAYFRSK  | FPELPFGAFV | PGGPLYDGLQ  | AGAADHVRLL | VPLVLEPGLW | SLVPGVDTVA  | RDPRCWAARR  |
|           | Cattle     | 155        | LAKQLAGDIA  | LELQAYLRNK  | FPELPFGALV | PGGPLYEGGLQ | VGAADPVRLL | VPLALEPGLW | SLVAGSDTVA  | QDPRCWAARR  |
|           | Camel      | 154        | LAKQLAGDVA  | LELQAYLRNK  | FPELPFGAVV | PGGPLYDGLQ  | AGAADPVRLL | VPLALEPGLW | SLVLTGDTVA  | RDPRCWAARR  |
|           | Dog        | 153        | LAKQLAGDIG  | LELQAYLRNK  | FPELPFGALV | PGGPLYDGLQ  | AGAARVHLL  | VPLVLEAGLW | SLVPGADTVA  | RDPRCWAARR  |
|           | Cat        | 153        | LAKQLAGDIA  | LELQAYLRNK  | FPELPFGALV | PGGPLYDGLQ  | GGAASRVLL  | VPLVLEAGLW | GLVPGVDTVA  | RDPRCWAARR  |
|           | Squirrel   | 148        | LAKQLAGDIA  | LELQAYFRSK  | FPELPFGVIV | PGGPLYDGLQ  | AGAADHVRLL | VPLVLEPSLW | SLVPGVDTVA  | RDPRCWAARR  |
|           | Mouse      | 148        | LAKQLAGDIA  | LELQAYLRNK  | FPELPFGALV | PGGPLYDGLQ  | AGTAEHVRLL | VPLELEPGLW | SLVPGVDTVA  | REPRCWAARR  |
|           | Rat        | 148        | LAKQLAGDIG  | LELQAYLRNK  | FPELPFGVIV | PGGPLYEGGLQ | AGTAEHVRLL | VPLELEPGLW | SLVPGMDTVA  | REPRCWAARR  |
|           | Frog       | 155        | EAKQLVLDIK  | KELQEFLLHAK | HPEMPFLALH | LGGSFGNRLP  | MSCLDHACLI | MPLVLEPDW  | CVIPGQKTIIL | SDPNFCMVRR  |
| Zebrafish | 155        | VAKQRALDIA | TELQAFLLHAK | HPEMPFLGDMT | LAGSLYDDLQ | VVTADHACLI  | VPLQLESSLW | TPIAGEDTFL | GHPEQYCMVRR |             |

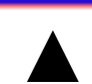

|       |            | $\alpha 5$ |            |            | $\alpha 6$ |            |            | $\alpha 7$  |            | $\beta 5$ | $\beta 6$ |           | $\beta 7$ |
|-------|------------|------------|------------|------------|------------|------------|------------|-------------|------------|-----------|-----------|-----------|-----------|
| MiD51 | Human      | 236        | ENPEYFPRGS | SYWDRCVVGG | YLSPKTVADT | FEKVVAGSIN | WPAIGSLLDY | VIRPAPPPEA  | LTLEVQ     | ---       | ---       | YERDKHLF  |           |
|       | Chimpanzee | 236        | ENPEYFPRGS | SYWDRCVVGG | YLSPKTVADT | FEKVVAGSIN | WPAIGSLLDY | VIRPAPPPEA  | LTLEVQ     | ---       | ---       | YERDKHLF  |           |
|       | Monkey     | 236        | ENPEYFPRGS | SYWDRCVVGG | YLSPKTVADT | FEKVVAGSIN | WPAIGSLLDY | VIRPAPPPEA  | LTLEVQ     | ---       | ---       | YERDKHLF  |           |
|       | Cattle     | 236        | ENPEYFPRGS | SYWDRCVVGG | YLSPKTVADT | FEKVVAGSIN | WPAIGSLLDY | VIRPAPPPEA  | LTLEVQ     | ---       | ---       | YERDKHLV  |           |
|       | Pig        | 236        | ENPEYFPRGS | SYWDRCVVGG | YLSPKTVADT | FEKVVAGSIN | WPAIGSLLDY | VIRPAPPPEA  | LTLEVQ     | ---       | ---       | YERDKHLV  |           |
|       | Camel      | 236        | ENPEYFPRGS | SYWDRCVVGG | YLSPKTVADT | FEKVVAGSIN | WPAIGSLLDY | VIRPAPPPEA  | LTLEVQ     | ---       | ---       | YERDKHLI  |           |
|       | Dog        | 236        | ENPEYFPRGS | SYWDRCVVGG | YLSPKTVADT | FEKVVAGSIN | WPAIGSLLDY | VIRPAPPPEA  | LTLEVQ     | ---       | ---       | YERDKHLI  |           |
|       | Rat        | 236        | ENPEYFPRGS | SYWDRCVVGG | YLSPKTVADT | FEKVVAGSIN | WPAIGSLLDY | VIRPAPPPEA  | LTLEVQ     | ---       | ---       | YERDKHLV  |           |
|       | Mouse      | 236        | ENPEYFPRGS | SYWDRCVVGG | YLSPKTVADT | FEKVVAGSIN | WPAIGSLLDY | VIRPAPPPEA  | LTLEVQ     | ---       | ---       | YERDKHLV  |           |
|       | Chicken    | 237        | ENPEYFPRGS | SYWDRCVVGG | YLSPKVAEAT | FEKVVAGSIN | WPAIGSLLDY | VIRPAPPPEA  | LTLEVQ     | ---       | ---       | YDPERRLF  |           |
|       | Frog       | 236        | ENPEYFPRGS | SYWDRCVVGG | YLSPKTVADT | FEKVVAGSIN | WPAIGSLLDY | VIRPAPPPEA  | LTLEVQ     | ---       | ---       | YERDKHLF  |           |
|       | Zebrafish  | 237        | ENLEYFPRGS | SYWDRCVVGG | YLSPKSVLEV | FEKLVAGSIN | WPAIGSLLDY | VIRPVVPSSET | LTLEVQ     | ---       | ---       | YETDRRLY  |           |
| MiD49 | Human      | 228        | TQLEFCPRGS | SPWDRFLVGG | YLSRVLLEL  | LRKALAASVN | WPAIGSLLGC | LIRPSMASEE  | LLLEVQ     | ---       | ---       | HERLELTV  |           |
|       | Chimpanzee | 228        | TQLEFCPRGS | SPWDRFLVGG | YLSRVLLEL  | LRKALAASVN | WPAIGSLLGC | LIRPSMASEE  | LLLEVQ     | ---       | ---       | HERLELTV  |           |
|       | Cattle     | 235        | TQLEFCPRGS | SPWDRFLVGG | YLSRVLLEL  | LRKALTASVT | WPAIGSLLGC | LIRPCVASDE  | LLLEVQ     | ---       | ---       | HECLELTV  |           |
|       | Camel      | 234        | TQLEFCPRGS | SPWDRFLVGG | YLSRVLLEL  | LRKALTASVN | WPAIGSLLGC | LIRPVSASEE  | LLLEVQ     | ---       | ---       | HERLELTV  |           |
|       | Dog        | 233        | TQLEFCPRGS | SPWDRFLVGG | YLSRVLLEL  | LRKALASCVN | WPAIGSLLGC | LIRPSVAEE   | LLLEVQ     | ---       | ---       | HERLELTV  |           |
|       | Cat        | 233        | TQLEFCPRGS | SPWDRFLVGG | YLSRVLLEL  | LRKALASSVN | WPAIGSLLGC | LIRPSVAEE   | LLLDVQ     | ---       | ---       | HERLELTV  |           |
|       | Squirrel   | 228        | TQLEFCPRGS | SPWDRFLVGG | YLSRVLLEL  | LHKALAASVN | WPAIGSLLGC | LILENVASEE  | LLLEVR     | ---       | ---       | HERLELTV  |           |
|       | Mouse      | 228        | TQLEFCPRGS | SPWDRFLVGG | YLSRVLLEL  | LRKALSASVN | WPAIGSLLGC | LIWPDVASEE  | LLLVQ      | ---       | ---       | HECLEFTL  |           |
|       | Rat        | 228        | TQLEFCPRGS | SPWDRFLVGG | YLSRVLLEL  | LRKALSASVN | WPAIGSLLGC | LIWPDVASEE  | LLLVQ      | ---       | ---       | HECLEFTL  |           |
|       | Frog       | 235        | IDLENTSRGS | SPWDRFLVGA | YLSRRTMVQS | LHKTIVGSIN | WPAIGTVLDC | TIKPDITSDE  | IKLEVQ     | ---       | ---       | HPNGHMI I |           |
|       | Zebrafish  | 235        | ENLEYFPRGR | SYWDRHLLGA | YLSRRLVCEQ | LSKAVMESMN | WPSITGTLEC | EVVRVVLGSP  | IKLEIQGLTQ | SSHDS     | SGERFY    |           |           |

|       |            | $\beta 7$ | $\beta 8$   | $\alpha 8$ | $\beta 9$  | $\alpha 9$ | $\alpha 10$ |             | $\alpha 11$ |             |
|-------|------------|-----------|-------------|------------|------------|------------|-------------|-------------|-------------|-------------|
| MiD51 | Human      | 310       | IDFILPSVTLG | D-TVLVAKPH | RLAQY--DNL | WRSLRPAET  | ARLRALDQAD  | SGCRSLCLKI  | LKAIACKSTPA | DGHLTASQILT |
|       | Chimpanzee | 310       | IDFILPSVTLG | D-TVLVAKPH | RLAQY--DNL | WRSLRPAET  | ARLRALDQAD  | SGCRSLCLKI  | LKAIACKSTPA | DGHLTASQILT |
|       | Monkey     | 310       | IDFILPSVTLG | D-TVLVAKPH | RLAQY--DNL | WRSLRPAET  | ARLRALDQAD  | SGCRSLCLKI  | LKAIACKSTPS | DGHLTASQILT |
|       | Cattle     | 310       | IDFILPSVTLG | D-TVLVAKPH | RLAQY--DNL | WRSLRPAET  | ARLRALDQAD  | SGCRSLCLKI  | LKAVCKSTPA  | DGHLTASQILT |
|       | Pig        | 310       | IDFILPSVTLG | D-TVLVAKPH | RLAQY--DNL | WRSLRPAET  | ARLRALDQAD  | SGCRSLCLKI  | LKAIACKSTPA | DGHLTASQILT |
|       | Camel      | 310       | IDFILPSVTLG | D-TVLVARPH | RLAQY--DNL | WRSLRPAET  | ARLRALDQAD  | LGCRSLCLKI  | LKAIACKSTPA | DGHLTASQILT |
|       | Dog        | 310       | IDFILPSVTLG | D-TVLVARPH | RLAQY--DNL | WRSLRPAET  | ARLRALDQAD  | SGCRSLCLKI  | LKAIACKSTPA | DGHLTASQILT |
|       | Rat        | 310       | IDFILPSVTLG | D-TVLVARPH | RLAQY--DNL | WRSLRPAET  | ARLRALDQAD  | SGCRSLCLKI  | LKAIACKSTPA | DGHLTASQILT |
|       | Mouse      | 310       | IDFILPSVTLG | D-TVLVARPH | RLAQY--DNL | WRSLRPAET  | ARLRALDQAD  | SGCRSLCLKI  | LKAIACKSTPA | DGHLTASQILT |
|       | Chicken    | 311       | IDFILPSLTIG | D-IVLVAKPH | RLAQN--DNL | WRSLRPAET  | ARLRALDQCD  | SGCRCLCLKI  | FKAVCKLNPA  | DGHLTASQILT |
|       | Frog       | 310       | IDFILPSVTLG | D-TVLVAKPH | RLAQY--DNL | WRSLRPAET  | ARLRALDQAD  | SGCRSLCLKI  | LKAIACKSTPA | DGHLTASQILT |
|       | Zebrafish  | 311       | VDFLPLLVM   | DGVSLIAKPH | RLAAERHENL | WRQSERVAET | AKLRALDQED  | AGCRSVCCLKI | LKAVCKLNPA  | DARLNASQILT |
| MiD49 | Human      | 302       | AVLVAVPGVD  | ADDRLLLAWP | LEGLA--GNL | WLQDLYPVEA | ARLRALDHD   | AGTRRRLLLL  | LCAVCRGCSA  | DGQLGRGHLT  |
|       | Chimpanzee | 302       | AVLVAVPGVD  | ADDRLLLAWP | LEGLA--GNL | WLQDLYPVEA | ARLRALDHD   | AGTRRRLLLL  | LCAVCRGCSA  | DGQLGRGHLT  |
|       | Cattle     | 309       | AVLLAVAGAQ  | DGD-LLLAWP | LEGLA--GNL | WLQDWYPAEA | ARLRALDEQD  | AGTRRRLLLL  | LCAVCRSHPA  | DWRLLGRDRLA |
|       | Camel      | 308       | AVLLAVTGAQ  | AGDRLLLAWP | LEGLA--GNL | WLQDLYPAEA | ARLRALDAGD  | TGTRRRLLLL  | LCGVCRGHSV  | DWRLLGRSHLT |
|       | Dog        | 307       | AVLLVAVGAG  | PEDPVLAWP  | LEGLA--GNL | WLQDLYPAEA | ARLRALDARD  | AGTRRRLLRL  | LCGVCRRHPS  | DWRLLDRRHLT |
|       | Cat        | 307       | AVLLAVTGAQ  | AEDRLLLAWP | LEGLA--GNL | WLQDLYPAEA | ARLRALDARD  | AGTRRRLLRL  | LCGVCRGHPA  | DGRLLDRCHLT |
|       | Squirrel   | 302       | AVLVAVPGAE  | ADDHLLLAWP | LEGLA--GNL | WLQDLYPVEA | ARLRALDQSD  | AGTRRRLLLL  | LCAVCRGCPA  | DGQLGRAHLT  |
|       | Mouse      | 302       | AVLMVVPAS   | TDDRLLLAWP | LEGLA--SNL | WLQDLYPVET | ARLRALDQD   | AGTRRRLLLL  | LCGICRGHPA  | DWRLLGWSHLT |
|       | Rat        | 302       | AVLMVVPAS   | TDDRLLLAWP | LEGLA--SNL | WLQDLYPVET | ARLRALDQD   | AGTRRRLLLL  | LCGVCRGHPV  | DWRLLGWSHLT |
|       | Frog       | 309       | RILEMA--VI  | KDADLLAHCC | ATAPA--ENL | WQRSFYKKEV | SRLQELDSSD  | SGIRLKLQI   | LKGTICRDCPS | DCHLNSTHLR  |
|       | Zebrafish  | 309       | ITVLPVTRLG  | Q-MTLMAQRE | ITGSF--DYV | WYQSLSYSET | ARLAALDQAD  | SGARRKCLKT  | LKAVCRNCPA  | DWRLLNGSHIS |

|       |            | $\alpha 11$ | $\alpha 12$ | $\alpha 13$ | $\alpha 14$ |            |            |             |            |            |
|-------|------------|-------------|-------------|-------------|-------------|------------|------------|-------------|------------|------------|
| MiD51 | Human      | 387         | NVILHLAQEE  | ADWSPDMLAD  | RFLQALRGLI  | SYLEAGVLP  | ALNPKVNLFA | EITPEEIDEL  | GYTLYCSLSE | PEVLLQT--- |
|       | Chimpanzee | 387         | NVILHLAQEE  | ADWSPDMLAD  | RFLQALRGLI  | SYLEAGVLP  | ALNPKVNLFA | EITPEEIDEL  | GYTLYCSLSE | PEVLLQT--- |
|       | Monkey     | 387         | NVILHLAQEE  | ADWSPDMLAD  | RFLQALRGLI  | SYLEAGVLP  | ALNPKVNLFA | EITPEEIDEL  | GYTLYCSLSE | PEVLLQT--- |
|       | Cattle     | 387         | NVILHLAQEE  | ADWSPDMLAD  | RFLQALRGLI  | SHLEAGVLP  | VLNPKVNLFA | EITPEEIDEL  | GYTLYCSLSE | PEVLLQT--- |
|       | Pig        | 387         | SVILHLAQEE  | ADWSPDMLAD  | RFLQALRGLI  | SYLEAGVLP  | ALNPKVNLFA | EITPEEIDEL  | GYTLYCSLSE | PEVLLQT--- |
|       | Camel      | 387         | NVILHLAQEE  | ADWSPDMLAD  | RFLQALRGLI  | SYLEAGVLP  | ALNPKVNLFA | EITPEEIDEL  | GYTLYCSLSE | PEVLLQT--- |
|       | Dog        | 387         | NVILHLAQEE  | ADWSPDMLAD  | RFLQALRGLI  | SYLEAGVLP  | ALNPKVNLFA | EITPEEIDEL  | GYTLYCSLSE | PEVLLQT--- |
|       | Rat        | 387         | NVILHLSQEE  | ADWSPDMLAD  | RFLQALRGLI  | SYLEAGVLP  | ALNPKVNLFA | EITPHEIDEL  | GYTLYCSLSE | PEVLLQT--- |
|       | Mouse      | 387         | NVILHLAQEE  | ADWSPDMLAD  | RFLQALRGLI  | SYLEAGVLP  | ALNPKVNLFA | EITPQEIDEL  | GYTLYCSLSE | PEVLLQT--- |
|       | Chicken    | 388         | NVILHLSQEE  | SNWSQDVLAD  | RFLQALRGLI  | RYLEAGVLP  | ALNPKVNLFS | EITPEEIDEL  | GYTLYSSLSE | PEVLLQT--- |
|       | Frog       | 387         | NVILHLAQEE  | ADWSPDMLAD  | RFLQALRGLI  | SYLEAGVLP  | ALNPKVNLFA | EITPEEIDEL  | GYTLYCSLSE | PEVLLQT--- |
|       | Zebrafish  | 391         | NAIILLSEQE  | GDWTQEALAD  | RFMQLLRALV  | GHLEAGRMP  | TLNLKVNLC  | EITPQEIDEL  | GYTLYCALSD | PESLLRTV-- |
| MiD49 | Human      | 380         | QVVLRLGEDN  | VDWTEALGE   | RFLQALELLI  | GSLEQASLPC | HFNPSVNLFS | SIREEEIDDI  | GYALYSGLOE | PEGLL----  |
|       | Chimpanzee | 380         | QVVLRLGEDN  | VDWTEALGE   | RFLQALELLI  | GSLEQASLPC | HFNPSVNLFS | SIREEEIDDI  | GYALYSGLOE | PEGLL----  |
|       | Cattle     | 386         | QVVLRLGEQE  | ADWAEALGE   | RFLQALELLI  | SSLERASLPS | HFNPSVNLFD | GIREEEIDDL  | GYALYHGLQA | PEGLL----  |
|       | Camel      | 386         | QVVLRLGEEE  | ADWAEALGE   | RFLQALELLI  | GSLEQASLPC | HFNPSVNLFD | GIREEEVEDL  | GYALYCGLOA | PEGLLWGGVG |
|       | Dog        | 385         | QVVLRLGEHE  | ADWAEALGA   | RFLQALEALV  | DSLERASLPC | QLNPSVNLFG | SIRDEEIDAL  | GFALFCGLQA | PEWLL----  |
|       | Cat        | 386         | QVVLRLGEEE  | VDWAEALGE   | RFLQALESLI  | DSLERASLPC | HFNPSVNLFS | GIREEEIDDI  | GYALYSGLOA | PECLL----  |
|       | Squirrel   | 380         | QVVLRLGEDN  | VDWTEALGE   | RFLQALELLI  | GSLEQASLPC | HFNPSVNLFS | SIREEEIDDL  | GYALYSGLOE | PEGLL----  |
|       | Mouse      | 380         | QVVLRLGEEE  | VAWTEALGE   | RFLQALEFLV  | GSLEQASLPC | HFNPSVNLFG | NFREEEIDDI  | GYVLYSGLOV | PESLF----  |
|       | Rat        | 380         | QVILRLGEEE  | VAWTEALGE   | RFLQALEFLV  | GSLEQASLPC | HFNPSVNLFG | SFREEEIDDI  | GYVLYSGLOV | PESLF----  |
|       | Frog       | 385         | HILLHLSTES  | SDWTETALAD  | RFLQVLEELI  | GYLDKGF    | YFNPKVNLFS | SILKAEIDDEL | GYGLYQVFSE | PDVLLKRER- |
|       | Zebrafish  | 392         | NVVLHMLSEKE | TDWSEAFSN   | RFLQALTELI  | GYLETVGLPS | YFKANVNLFQ | GETEDDIDEM  | GYMLYCAVTE | PEILLI---- |

★ ★ ★
